# Supplementary material
Source: PubMed Central journal article supplement (PMC3419847)
Supplement: Supp_Data.pdf [file Supp_Data.pdf]

## **SUPPLEMENTAL FIGURE LEGENDS**

### **Supplemental Figure 1. Distribution of the cumulative number of health-related deficits**

**among Health ABC participants.** Health ABC participants were scored with respect to the 45 health deficits listed in Supplemental Table 2. The grey background region outlines the fraction of participants categorized as “frail” according to published guidelines (i.e., index > 0.20, see Searle et al. 2008, *BMC Geriatr* 8:24).

### **Supplemental Figure 2. Overview of data mining procedure used to identify variables that**

**best predict mortality in the Health ABC cohort.** A total of 3300 variables were identified

using information collected from Health ABC participants during baseline (year 1) examinations

( $X_1, X_2 \dots X_{3300}$ ). Of these variables, we identified 825 that met inclusion criteria ( $X_1, X_2 \dots X_{825}$ ).

One or more data vectors were generated from each of the 825 variables (i.e., 0-1 indicators for

categorical variables or alternatively scaled versions of each continuous variable), which yielded

a total of 3683 representative data vectors ( $V_1, V_2 \dots V_{3683}$ ) that were examined in cross-validation

simulation trials. The 3683 vectors were evaluated using a computationally efficient procedure in

which all vectors were first screened using a small number of simulation trials, with subsequent

re-evaluation of only high-scoring vectors using a larger number of simulation trials. In the first

cross-validation screen, all 3683 vectors were evaluated using 30 cross-validation trials per

vector. From these experiments, the top 500 vectors with strongest prognostic value were

identified (i.e., those with the largest mean AUC in the 30 cross-validation trials;  $V_{(1)}, V_{(2)} \dots$

$V_{(500)}$ ). In the second screen, the top 500 vectors were re-evaluated using 300 cross-validation

trials per vector. From these experiments, the top 50 vectors with strongest prognostic value were

identified ( $V_{(1)}, V_{(2)} \dots V_{(50)}$ ). In the third screen, relative value of the top 50 vectors was

established by calculating the average AUC across 30,000 simulation trials. The 50 vectors were then re-assigned to the variables from which they were derived, yielding a ranking of the top  $p$  variables (with  $p \leq 50$ ). If two or more vectors mapped to the same variable, then the largest mean AUC estimate among all associated vectors was assigned to that variable.

**Supplemental Figure 3. DSST score and cystatin C predict mortality better than chronological age and a health deficit index in the full Health ABC cohort and 24 of 25 subgroups.** Ten-fold cross-validation was used to evaluate the relative prognostic value of DSST score, cystatin C, chronological age, and a 45-variable health deficit index (Supplemental Table 2) in the full Health ABC cohort and each of 25 subgroups. The horizontal axis shows the average AUC among 20,000 simulation trials conducted for each variable with respect to each participant group. Error bars denote the standard deviation among all 20,000 AUC estimates (standard errors are  $< 0.001$  in each case). To ensure comparability among variables, calculations were performed using the same sample size in each group ( $n$  values are listed in the left margin), with any missing values imputed using the nearest neighbor method. For each subgroup, an asterisk symbol (\*) denotes the largest average AUC value among the four variables.

**Supplemental Figure 4. DSST score and cystatin C improve the prediction accuracy of models that already include age and sex.** Ten models were evaluated based upon their ability to predict mortality among HABC participants, including five univariate models (top) and five multivariate models (bottom). The average AUC was calculated for each model based upon 20,000 cross-validation trials (right margin). Error bars show the standard deviation among AUC estimates in the 20,000 cross-validation trials.

Supplemental Figure 1

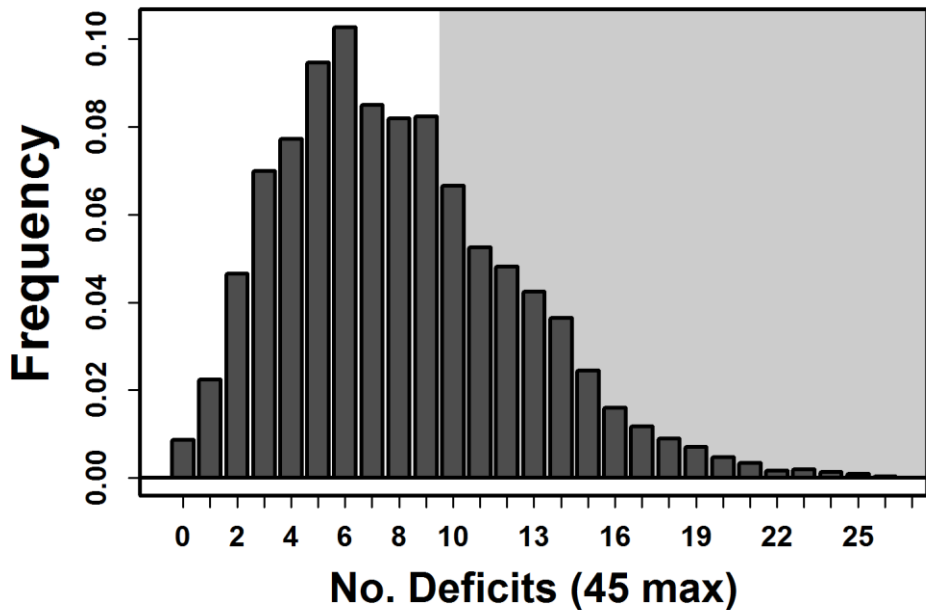

# Data Mining Procedure (Overview)

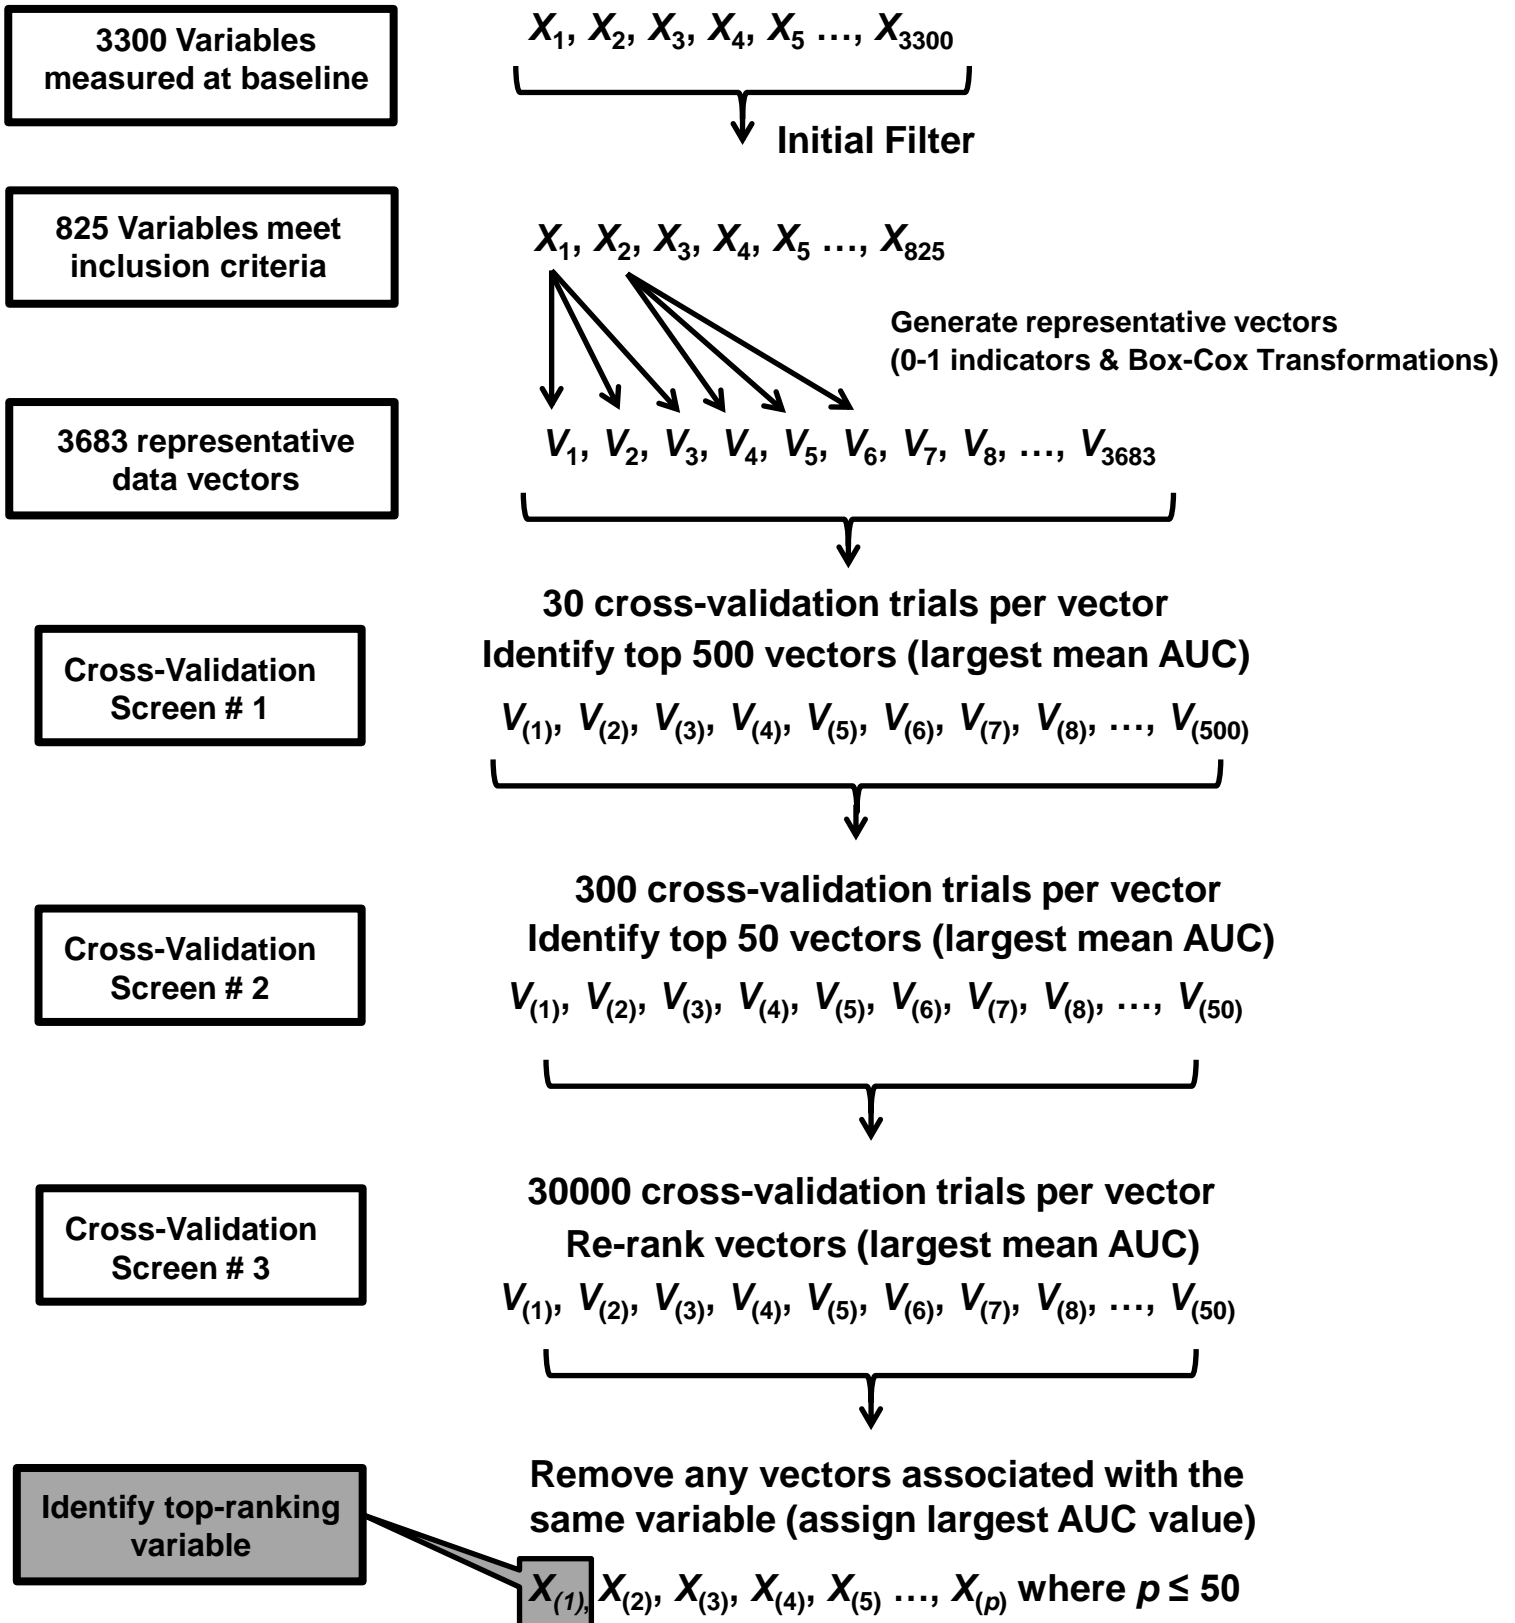

Supplemental Figure 3

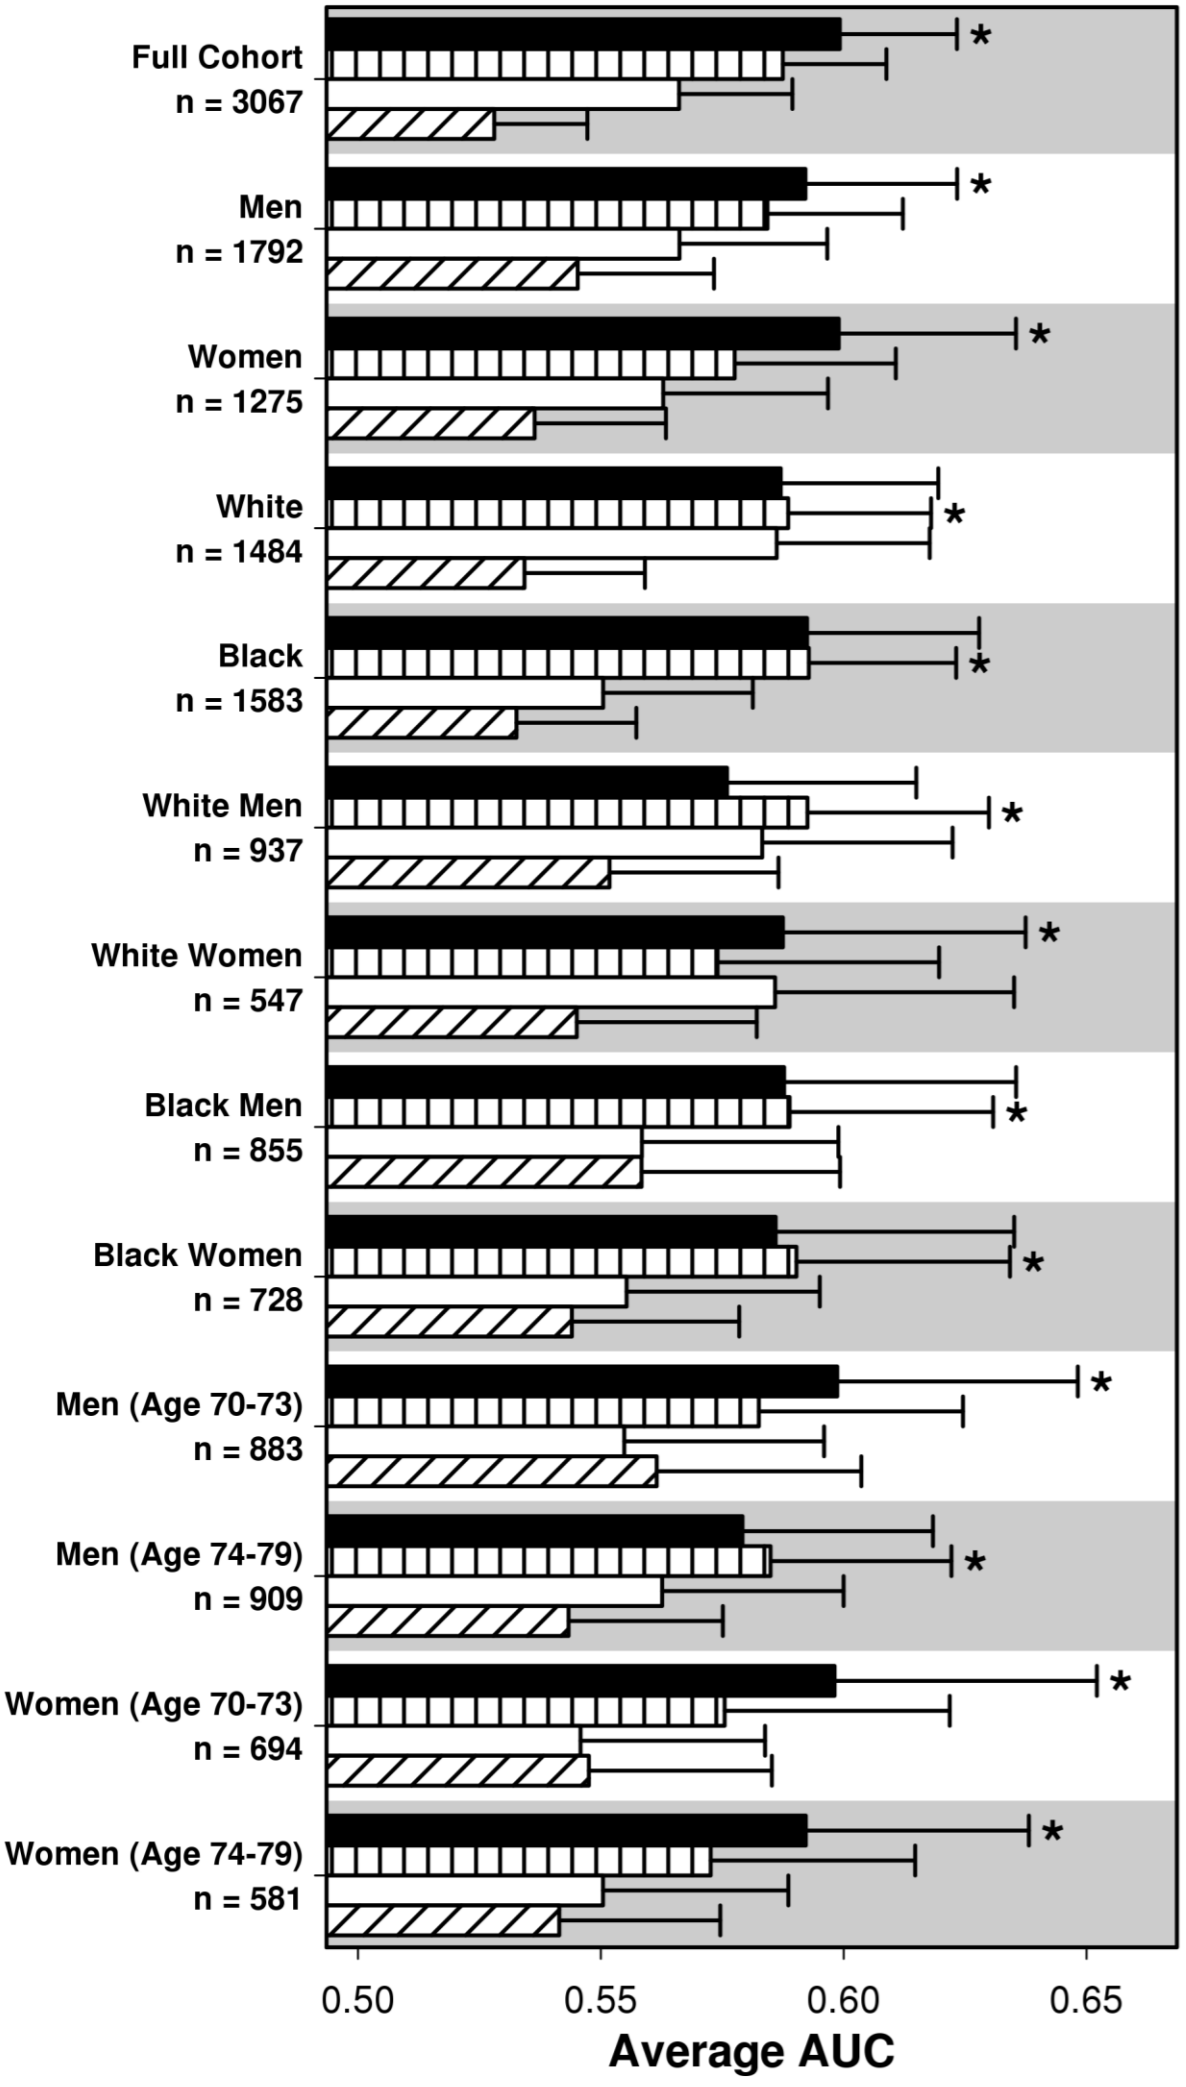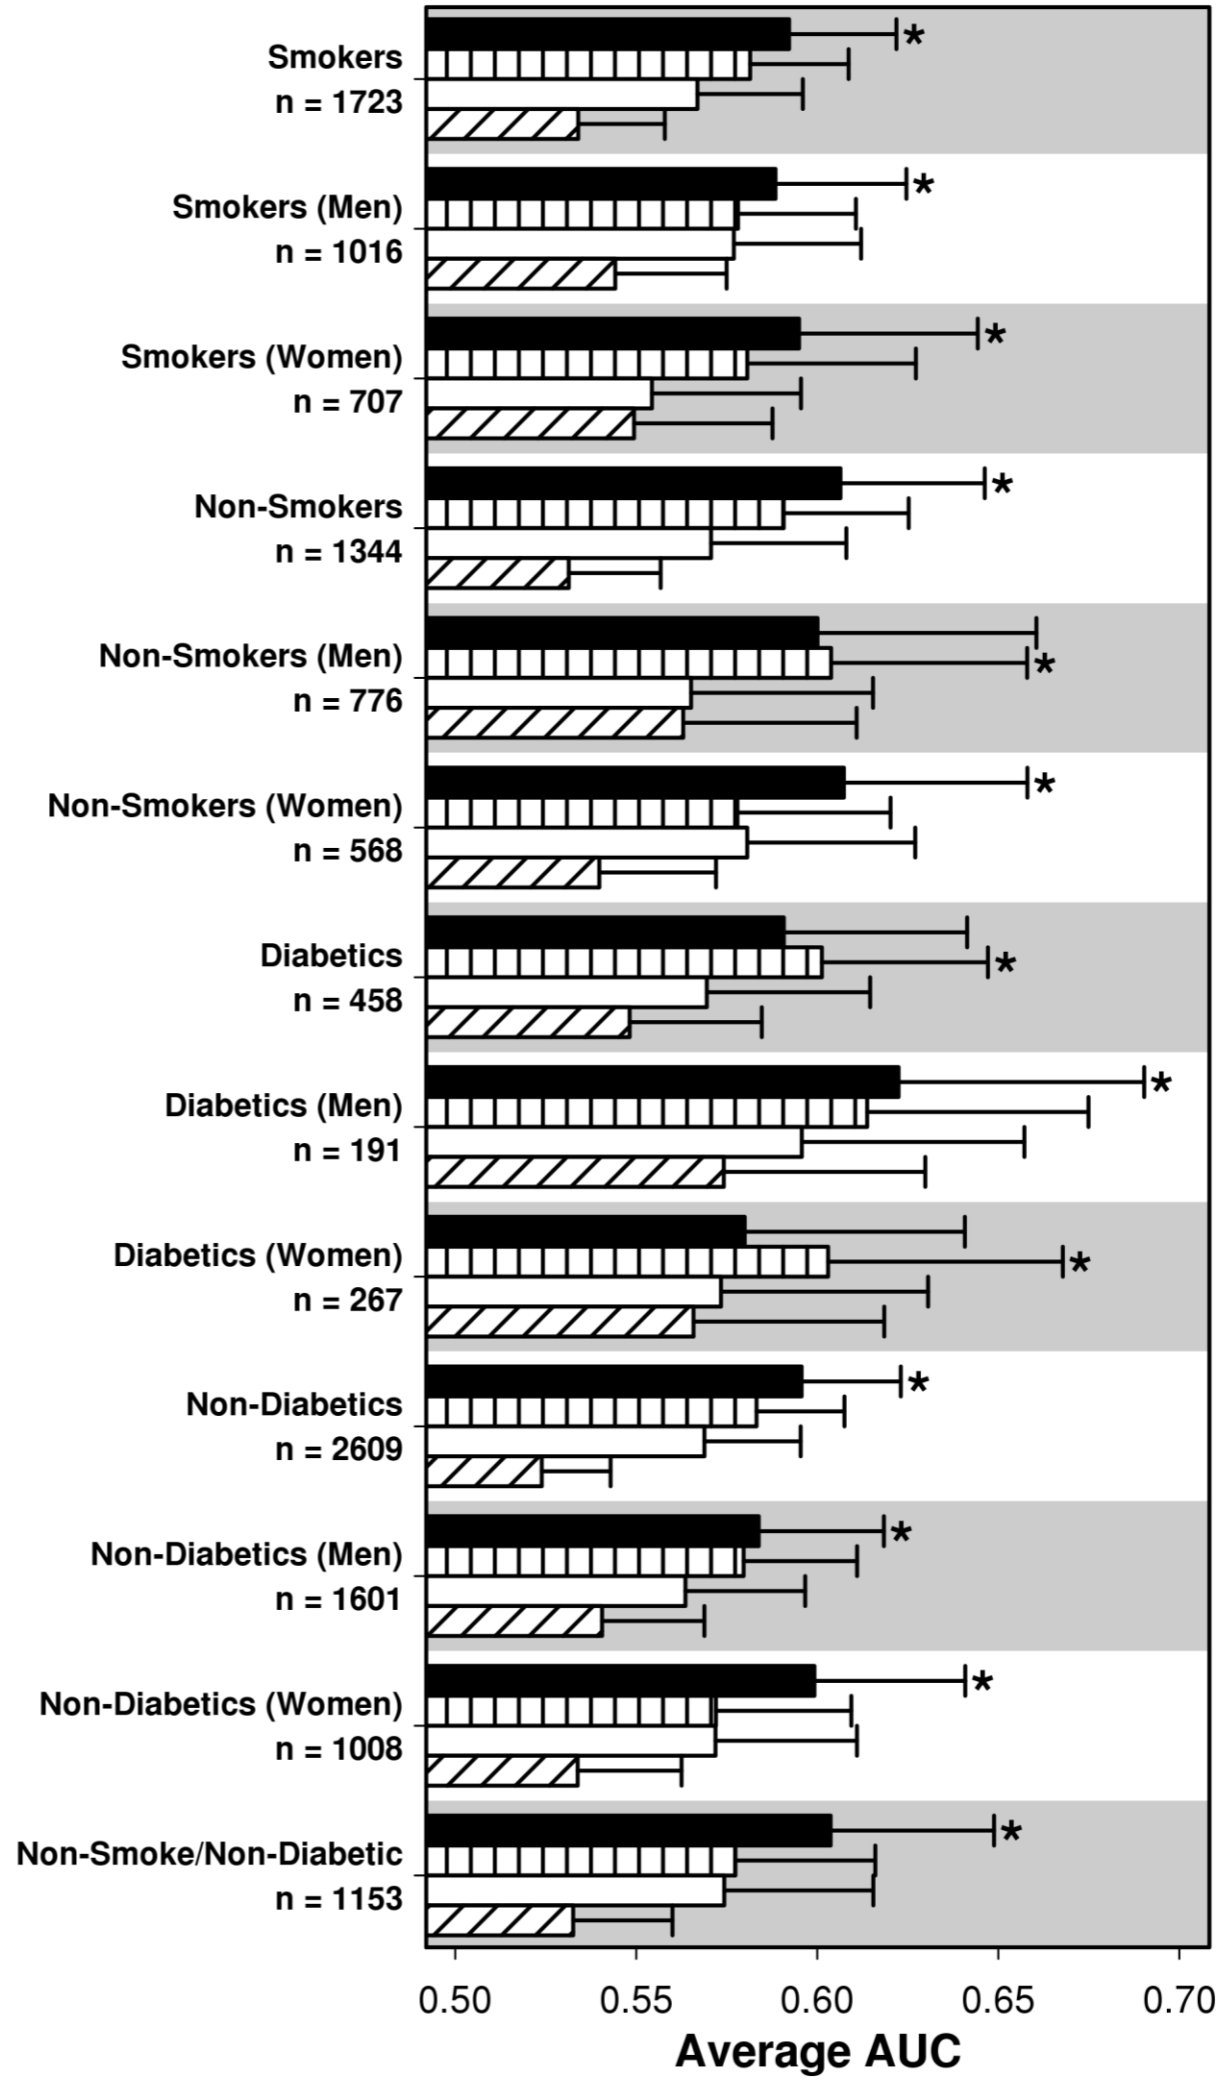

DSST Score  
 Cystatin C  
 Age  
 Deficit Index

# Supplemental Figure 4

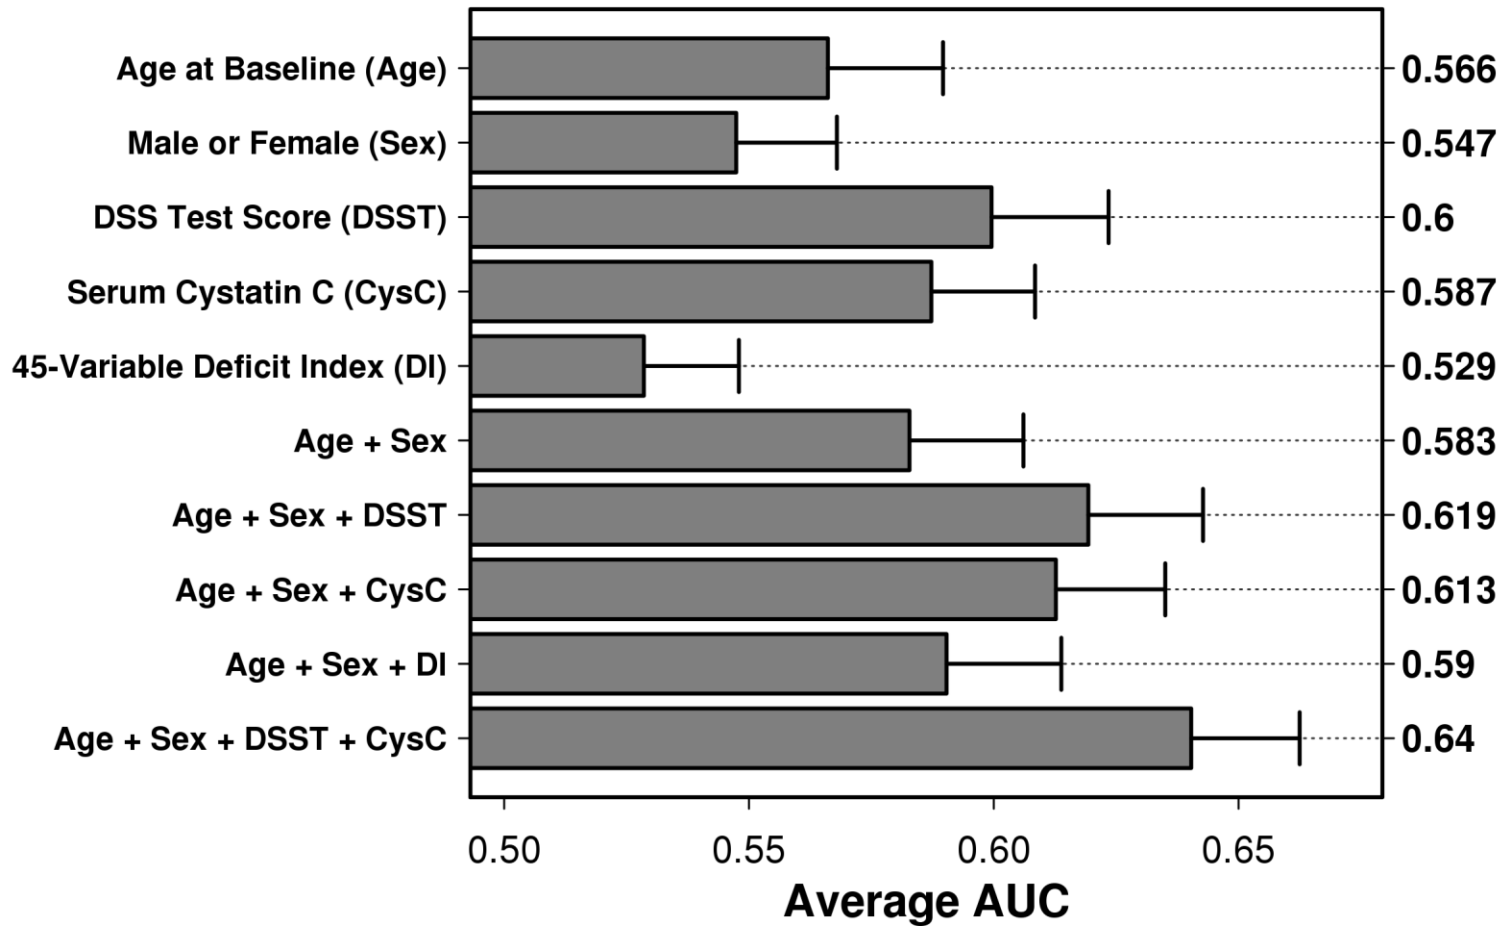

**Supplemental Table 1. Characteristics of the Health ABC cohort at baseline examination.**

The table lists the mean (standard deviation) for key baseline measures among men and women in the Health ABC cohort. Sample sizes differ slightly among variables since missing values were excluded from calculations ( $1562 \leq n \leq 1583$  for men;  $1459 \leq n \leq 1484$  for women).

| Variable                             | Men            | Women         |
|--------------------------------------|----------------|---------------|
| Age                                  | 74.31 (2.87)   | 74.03 (2.87)  |
| Body Weight (Kg)                     | 81.35 (13.2)   | 70.56 (14.71) |
| Body Mass Index (Kg/m <sup>2</sup> ) | 27.05 (3.92)   | 27.7 (5.49)   |
| Sitting systolic BP (mmHg)           | 135.14 (20.78) | 136.44 (21.2) |
| Sitting diastolic BP (mmHg)          | 72.68 (11.37)  | 70.17 (11.88) |
| Cystatin C (mg/L)                    | 1.08 (0.36)    | 1.01 (0.33)   |
| Creatinine (mg/dL)                   | 1.18 (0.44)    | 0.95 (0.36)   |
| DSST score                           | 33.75 (14.42)  | 37.04 (14.59) |
| Smoking (pack-years)                 | 26.37 (31.05)  | 12.27 (22.85) |

**Supplemental Table 2.** Components of the 45-variable health deficit index. The index was constructed following guidelines proposed by Searle et al. 2008 (*BMC Geriatr* 8:24). The individual variables were scored dichotomously as a deficit (value = 1) or a non-deficit (value = 0). For each Health ABC participant, these scored values (0 or 1) were summed across the 45 variables and the index value was equal to the sum total, divided by the total number of variables (i.e., 45).

| Variable Index | Description                                                                                                                                                                                                             | Scored as Deficit |
|----------------|-------------------------------------------------------------------------------------------------------------------------------------------------------------------------------------------------------------------------|-------------------|
| 1              | In general how would you say your health is? (1 = excellent; 2 = very good; 3 = good; 4 = fair; 5 = poor; 6 = don't know; 7 = refused)                                                                                  | 5 = poor          |
| 2              | During the past 12 months, have you been a patient in the hospital for more than one night? (1 = yes; 2 = no; 8 = don't know; 7 = refused)                                                                              | 1 = yes           |
| 3              | During the past 12 months, did you stay in bed all or most of the day because of an illness or injury? (1 = yes; 2 = no; 8 = don't know; 7 = refused)                                                                   | 1 = yes           |
| 4              | During the past 12 months, did you cut down on things you usually do, such as going to work out or work around the house, because of an illness or injury? (1 = yes; 2 = no; 8 = don't know; 7 = refused)               | 1 = yes           |
| 5              | During the past 12 months, did you have the flu or a flu-like illness that kept you in bed for at least a day? (1 = yes; 2 = no; 8 = don't know; 7 = refused)                                                           | 1 = yes           |
| 6              | Because of a health or physical problem, do you have difficulty standing up from a chair without using your arms? (1 = yes; 2 = no; 8 = don't know; 7 = refused)                                                        | 1 = yes           |
| 7              | Because of a health or physical problem, do you have difficulty lifting or carrying something weighing 10 pounds, for example a small bag of groceries or an infant? (1 = yes; 2 = no; 8 = don't know; 7 = refused)     | 1 = yes           |
| 8              | Because of a health or physical problem, do you have difficulty stooping, crouching or kneeling? (1 = yes; 2 = no; 8 = don't know; 7 = refused)                                                                         | 1 = yes           |
| 9              | Do you have any difficult pushing or pulling large objects, like a living room chair? (1 = yes; 2 = no; 8 = don't know; 7 = refused)                                                                                    | 1 = yes           |
| 10             | Do you have any difficulty doing heavy work around the house like vacuuming, shoveling snow, mowing or raking the lawn, gardening or scrubbing windows, walls or floors? (1 = yes; 2 = no; 8 = don't know; 7 = refused) | 1 = yes           |



|    |                                                                                                                                                                                              |                                      |
|----|----------------------------------------------------------------------------------------------------------------------------------------------------------------------------------------------|--------------------------------------|
| 11 | Do you have any difficult using your fingers to grasp or handle? (1 = yes; 2 = no; 8 = don't know; 7 = refused)                                                                              | 1 = yes                              |
| 12 | Do you have any difficulty rasing your arms up over your head? (1 = yes; 2 = no; 8 = don't know; 7 = refused)                                                                                | 1 = yes                              |
| 13 | Do you have an illness or condition that interferes with your appetite or ability to eat? (1 = yes; 2 = no; 8 = don't know; 7 = refused)                                                     | 1 = yes                              |
| 14 | Are there days when you don't feel like eating at all? (1 = yes; 2 = no; 8 = don't know; 7 = refused)                                                                                        | 1 = yes                              |
| 15 | Because of a health or physical problem, do you have any difficulty preparing meals? (1 = yes; 2 = no; 8 = don't know; 7 = refused)                                                          | 1 = yes                              |
| 16 | Because of a health or physical problem, do you have any difficulty shopping for food? (1 = yes; 2 = no; 8 = don't know; 7 = refused)                                                        | 1 = yes                              |
| 17 | At the present time, do you feel like you are underweight, about the right weight, or overweight? (1 = underweight; 2 = about the right weight; 3 = overweight; 8 = don't know; 7 = refused) | 1 = underweight or<br>3 = overweight |
| 18 | Did you experience any bodily pain in the last 30 days? (1 = yes; 2 = no; 8 = don't know; 7 = refused)                                                                                       | 1 = yes                              |
| 19 | Has a doctor ever told you that you have arthritis? (1 = yes; 2 = no; 8 = don't know; 7 = refused)                                                                                           | 1 = yes                              |
| 20 | Have you ever had pain lasting at least one month in or around the knee? (1 = yes; 2 = no; 8 = don't know; 7 = refused)                                                                      | 1 = yes                              |
| 21 | Have you ever had pain lasting at least one month in or around either hip? (1 = yes; 2 = no; 8 = don't know; 7 = refused)                                                                    | 1 = yes                              |
| 22 | In the past 12 months, have you had pain lasting at least one month in your feet, toes or ankles? (1 = yes; 2 = no; 8 = don't know; 7 = refused)                                             | 1 = yes                              |
| 23 | In the past 12 months, have you had pain lasting at least one month in either shoulder? (1 = yes; 2 = no; 8 = don't know; 7 = refused)                                                       | 1 = yes                              |
| 24 | In the past 12 months, have you had pain lasting at least one month in your neck? (1 = yes; 2 = no; 8 = don't know; 7 = refused)                                                             | 1 = yes                              |
| 25 | In the past 12 months, have you had any pain in your back? (1 = yes; 2 = no; 8 = don't know; 7 = refused)                                                                                    | 1 = yes                              |
| 26 | During the past 12 months, have you fallen and landed on the ground or floor? (1 = yes; 2 = no; 8 = don't know; 7 = refused)                                                                 | 1 = yes                              |
| 27 | During the past 12 months, have you fainted, blacked out or lost consciousness? (1 = yes; 2 = no; 8 = don't know; 7 = refused)                                                               | 1 = yes                              |

|    |                                                                                                                                               |         |
|----|-----------------------------------------------------------------------------------------------------------------------------------------------|---------|
| 28 | Has a doctor ever told you that you have osteoporosis, sometimes called thin or brittle bones? (1 = yes; 2 = no; 8 = don't know; 7 = refused) | 1 = yes |
| 29 | Has a doctor ever told you that you broke or fractured a bone after the age of 45? (1 = yes; 2 = no; 8 = don't know; 7 = refused)             | 1 = yes |
| 30 | Has a doctor ever told you that you had a fracture of the spine or of a vertebrae? (1 = yes; 2 = no; 8 = don't know; 7 = refused)             | 1 = yes |
| 31 | Has a doctor ever told you that you had heart attack or myocardial infarction? (1 = yes; 2 = no; 8 = don't know; 7 = refused)                 | 1 = yes |
| 32 | Has a doctor ever told you that you had congestive heart failure? (1 = yes; 2 = no; 8 = don't know; 7 = refused)                              | 1 = yes |
| 33 | Has a doctor ever told you that you had stroke, CVA, or cerebrovascular accident? (1 = yes; 2 = no; 8 = don't know; 7 = refused)              | 1 = yes |
| 34 | Has a doctor ever told you that you had hypertension or high blood pressure? (1 = yes; 2 = no; 8 = don't know; 7 = refused)                   | 1 = yes |
| 35 | Have you ever had any pain or discomfort in your chest? (1 = yes; 2 = no; 8 = don't know; 7 = refused)                                        | 1 = yes |
| 36 | Do you get a pain or discomfort in your leg(s) when you walk? (1 = yes; 2 = no; 8 = don't know; 7 = refused)                                  | 1 = yes |
| 37 | Has a doctor ever told you that you have asthma? (1 = yes; 2 = no; 8 = don't know; 7 = refused)                                               | 1 = yes |
| 38 | Has a doctor ever told you that you had cancer, a malignant growth, or malignant tumor? (1 = yes; 2 = no; 8 = don't know; 7 = refused)        | 1 = yes |
| 39 | Has a doctor ever told you that a stomach, or duodenal ulcer? (1 = yes; 2 = no; 8 = don't know; 7 = refused)                                  | 1 = yes |
| 40 | Has a doctor ever told you that you had diabetes or sugar diabetes? (1 = yes; 2 = no; 8 = don't know; 7 = refused)                            | 1 = yes |
| 41 | In the past 12 months, have you leaked even a small amount of urine unintentionally? (1 = yes; 2 = no; 8 = don't know; 7 = refused)           | 1 = yes |
| 42 | Has a doctor ever told you that you have glaucoma? (1 = yes; 2 = no; 8 = don't know; 7 = refused)                                             | 1 = yes |
| 43 | Has a doctor ever told you that you have macular degeneration? (1 = yes; 2 = no; 8 = don't know; 7 = refused)                                 | 1 = yes |
| 44 | Do you wear a hearing aid? (1 = yes; 2 = no; 8 = don't know; 7 = refused)                                                                     | 1 = yes |
| 45 | Do you feel that any difficulty with your hearing limits or hampers your social life? (1 = yes; 2 = no; 8 = don't know; 7 = refused)          | 1 = yes |

**Supplemental Table 3. Partial list of phenotypic and genetic measures included in screen (483 of 825 measures).** A total of 825 variables were identified that satisfied all inclusion criteria and were screened as part of the data mining procedure described in the manuscript (see Supplemental Figure 2). Variables were generated based upon information collected during a telephone interview, final eligibility assessment, recruitment status form and baseline questionnaire, imaging data processed and interpreted by specialists (e.g., soft tissue computed tomography, DXA and ECG), biospecimen analysis (e.g., blood and urine), and analysis of genetic polymorphisms. The table lists a subset of the 825 measures (483 / 825) that were significantly associated with mortality in univariate Cox regression models ( $P < 0.05$ ). Variables in the table are ranked according to the p-value (final column) associated with the estimated hazard ratio (fourth column). Cox regression models were fit based upon mortality data from  $n$  HABC participants lacking missing data with respect to a given variable (see third column).

| <b>HABC Variable ID</b> | <b>Description</b>                                                                                      | <b><i>n</i></b> | <b>HR (95% CI)</b>   | <b>P-value</b> |
|-------------------------|---------------------------------------------------------------------------------------------------------|-----------------|----------------------|----------------|
| CYST_UNCAL1             | Serum cystatin C (mg/L)                                                                                 | 3038            | 1.79 (1.66,1.93)     | 1.22E-51       |
| DSS                     | DSST score (No. correct substitutions)                                                                  | 3028            | 0.977 (0.974,0.981)  | 2.21E-36       |
| CREATIN1                | Serum creatinine (mg/dL)                                                                                | 3041            | 1.44 (1.36,1.53)     | 1.14E-34       |
| MMMScore                | Teng 3MS score (0 – 100) (Teng and Chui 1987, J Clin Psychiatry 48:314-318)                             | 3057            | 0.97 (0.966,0.975)   | 7.26E-31       |
| HABCPPB                 | Health ABC performance score (0 - 4) (Simonsick et al 2001, J Gerontol A Biol Sci Med Sci 56:M644-M649) | 2950            | 0.591 (0.537,0.649)  | 1.04E-27       |
| MHHCCHF                 | Has a Dr. ever told you that you have congestive heart failure? 1 if yes, 0 otherwise.                  | 3066            | 3.21 (2.55,4.04)     | 3.44E-23       |
| FSBTIME                 | Full standing balance test time (0 – 90 secs)                                                           | 3003            | 0.991 (0.989,0.993)  | 2.79E-20       |
| FSBRATIO                | Standing balance time ratio (i.e., full standing balance test time (0 - 90 secs) divided by 90)         | 3003            | 0.429 (0.359,0.514)  | 2.79E-20       |
| EPESEPPB                | EPESE performance battery score (0 - 12) (Studenski et al. 2003, J Am Geriatr Soc 51:314-322)           | 3015            | 0.863 (0.836,0.89)   | 3.54E-20       |
| SIXMWTM                 | Time to walk 6 m (sec)                                                                                  | 3044            | 1.2 (1.15,1.25)      | 1.02E-19       |
| BASEAGE                 | Age at baseline exam                                                                                    | 3067            | 1.09 (1.07,1.11)     | 1.26E-19       |
| Y1UWPACE                | Walking speed (m/sec) over 6 m                                                                          | 3047            | 0.349 (0.278,0.439)  | 2.37E-19       |
| Y1UWRATIO               | Usual walk performance ratio (i.e., walking speed (m/sec) over 3, 4, or 6 m divided by 2)               | 3047            | 0.122 (0.0772,0.193) | 2.57E-19       |
| Y1cargly                | Indicator variable for antiarrhythmic meds. 1 if yes, 0 otherwise.                                      | 3058            | 2.19 (1.84,2.6)      | 4.33E-19       |
| P3UPTM1                 | Balance walks: usual pace trial 1 time                                                                  | 3043            | 1.14 (1.11,1.18)     | 4.73E-18       |
| WHENSTOP                | Was long distance corridor walk completed? 1 if yes, 0 otherwise.                                       | 3067            | 0.608 (0.543,0.681)  | 5.96E-18       |
| QRS                     | ECG QRS duration                                                                                        | 3060            | 1.01 (1.01,1.01)     | 2.23E-17       |
| P3UPTM2                 | Balance walks: usual pace trial 2 time                                                                  | 3043            | 1.17 (1.12,1.21)     | 9.4E-17        |
| PACKYR1                 | Pack-years exposure to cigarettes                                                                       | 3021            | 1.01 (1,1.01)        | 9.59E-17       |

|           |                                                                                                                                                                       |      |                     |          |
|-----------|-----------------------------------------------------------------------------------------------------------------------------------------------------------------------|------|---------------------|----------|
| TOTPF     | Total % body fat                                                                                                                                                      | 2959 | 0.971 (0.964,0.978) | 2.91E-16 |
| WKAINDEX  | Walking ability index (0 = unable; 9 = easy)                                                                                                                          | 2962 | 0.873 (0.845,0.902) | 3.63E-16 |
| NWPACE    | Walking speed for narrow walk (6 m)                                                                                                                                   | 3044 | 0.643 (0.578,0.715) | 4.68E-16 |
| NWRATIO   | Narrow walk performance ratio (i.e., walking speed for narrow 6 m walk divided by 2)                                                                                  | 3044 | 0.415 (0.336,0.513) | 4.69E-16 |
| SMK1      | smoking: 1 if current smoker, 0 otherwise                                                                                                                             | 3062 | 1.84 (1.58,2.13)    | 9.5E-16  |
| RESISTIN1 | Plasma resistin (ng/mL)                                                                                                                                               | 3038 | 1.01 (1.01,1.01)    | 5.11E-15 |
| HG_A1C1   | Hemoglobin A1c (%)                                                                                                                                                    | 2989 | 1.17 (1.12,1.21)    | 1.53E-14 |
| FPLDKKWK  | Kcal/kg/week doing laundry                                                                                                                                            | 3050 | 0.921 (0.901,0.941) | 7.82E-14 |
| Y1rxtot   | Total number of prescription medications                                                                                                                              | 3048 | 1.07 (1.05,1.09)    | 1E-13    |
| EASEQM    | Ease walking 1/4 mice (0 = unable; 6 = easy)                                                                                                                          | 2962 | 0.721 (0.661,0.786) | 1.03E-13 |
| P1GLU     | Was glucose tolerance test done? 1 if yes, 0 otherwise.                                                                                                               | 3053 | 0.628 (0.556,0.71)  | 1.11E-13 |
| Y1loopdi  | Indicator variable for diuretic use with congestive heart failure. 1 if yes, 0 otherwise.                                                                             | 3058 | 1.99 (1.66,2.39)    | 1.5E-13  |
| CRP_LCBR1 | Serum c-reactive protein (ug/mL, core measurement by LCBR)                                                                                                            | 3031 | 1.03 (1.02,1.04)    | 1.63E-13 |
| MHHCHAMI  | Has a Dr. ever told you that you had a heart attack? 1 if yes, 0 otherwise.                                                                                           | 3065 | 0.59 (0.513,0.679)  | 1.66E-13 |
| EASE1M    | Ease walking 1 mine (0 = difficult; 3 = very easy)                                                                                                                    | 2962 | 0.845 (0.808,0.884) | 1.88E-13 |
| Y1dibdr   | Indicator variable for insulin and antidiabetic medications. 1 if yes, 0 otherwise.                                                                                   | 3058 | 1.67 (1.46,1.92)    | 1.96E-13 |
| P4BLU2    | Teng MMS, Question 17a. What three words did I ask you to remember earlier? 1 if participant correctly recalls the word "blue", 0 otherwise.                          | 3055 | 0.624 (0.549,0.708) | 3.34E-13 |
| GENDER    | Sex. 1 if female, 0 otherwise.                                                                                                                                        | 3067 | 0.678 (0.611,0.753) | 3.65E-13 |
| SBSCORE   | EPESE summary score for standing balance results                                                                                                                      | 3064 | 3.71 (2.59,5.3)     | 6.58E-13 |
| LBSGDIAB  | Has a Dr. ever told you that you have diabetes? 1 if no, 0 otherwise.                                                                                                 | 3066 | 0.622 (0.546,0.708) | 6.67E-13 |
| BQSC100   | Have you smoked at least 100 cigarettes? 1 if yes, 0 otherwise.                                                                                                       | 3067 | 1.48 (1.33,1.65)    | 7.7E-13  |
| LPFICD    | Do you (and your husband/wife/partner) own any CDs (certificates of deposit), savings bonds, or treasury bills? 1 if no, 0 otherwise.                                 | 3027 | 1.47 (1.32,1.64)    | 8.18E-13 |
| P4LCRY    | In what way are laughing and crying alike? 1 if participant answers erroneously or refuses to answer (e.g., states differences, gives unrelated answer), 0 otherwise. | 3054 | 1.51 (1.35,1.7)     | 1.37E-12 |
| LONGQRS   | ECG long QRS duration                                                                                                                                                 | 3060 | 1.83 (1.55,2.17)    | 1.71E-12 |
| VDEFCD    | 1 if participant has ventricular conduction defect of type "intraventricular block", 0 otherwise.                                                                     | 3067 | 3.75 (2.59,5.42)    | 2.26E-12 |

|          |                                                                                                                                                      |      |                     |          |
|----------|------------------------------------------------------------------------------------------------------------------------------------------------------|------|---------------------|----------|
| LLFEV1R6 | Lower limit of normal FEV1/FEV6 based on reference range published in Hankinson                                                                      | 3067 | 0.811 (0.765,0.86)  | 2.6E-12  |
| HR       | Heart rate                                                                                                                                           | 3066 | 1.02 (1.01,1.02)    | 4.42E-12 |
| P4LKE    | Teng MMS, Question 14b. Please write the following sentence: I would like to go out. 1 if participant correctly writes the word "like", 0 otherwise. | 3050 | 0.535 (0.447,0.64)  | 7.6E-12  |
| P3SEC    | Seconds to complete 5 chair stands                                                                                                                   | 2958 | 1.04 (1.03,1.05)    | 7.87E-12 |
| RTHSFD   | R Thigh Subcutaneous Fat Density (HU)                                                                                                                | 3008 | 1.02 (1.01,1.02)    | 8.94E-12 |
| CSRATIO  | Chair stands performance ratio (i.e., chair stands per second divided by 1). Value = 1 if ratio is larger than 1.                                    | 3028 | 0.205 (0.13,0.324)  | 8.95E-12 |
| THSFDavg | Thigh subcutaneous fat density (average of left and right thigh, HU)                                                                                 | 3008 | 1.02 (1.01,1.02)    | 9.7E-12  |
| P4HON2   | Teng MMS, Question 17c. What three words did I ask you to remember earlier? 1 if participant spontaneously recalls the word "honesty", 0 otherwise.  | 3054 | 0.687 (0.617,0.765) | 1.02E-11 |
| LTHSFD   | Left thigh subcutaneous fat density (HU)                                                                                                             | 3008 | 1.02 (1.01,1.02)    | 1.51E-11 |
| DID2MINW | Completed 2 minute walk? 1 if yes, 0 otherwise.                                                                                                      | 3067 | 0.631 (0.551,0.723) | 2.82E-11 |
| FPHOSP12 | During the past 12 months, have you been a patient in a hospital for one or more nights? 1 if no, 0 otherwise.                                       | 3066 | 0.638 (0.559,0.729) | 3E-11    |
| P4SCR    | Teng MMS, Question 9. What animals have four legs? Tell me as many as you can.                                                                       | 3053 | 0.939 (0.922,0.957) | 3.13E-11 |
| P320TR1  | 20 cm narrow walk (trial 1). Did participant stay inside the lines? 1 if yes, 0 otherwise.                                                           | 3034 | 0.68 (0.607,0.763)  | 3.81E-11 |
| BQWT25   | What was your usual weight at about age 25? If you don't remember exactly, please make your best guess                                               | 2993 | 1.01 (1,1.01)       | 4.53E-11 |
| P4BLRM   | Teng MMS, Question 5b. What three words did I ask you to remember earlier? 1 if participant spontaneously recalls the word "blue", 0 otherwise.      | 3057 | 0.669 (0.594,0.755) | 6.31E-11 |
| LTHBONE  | Left thigh bone area (cm-sq)                                                                                                                         | 3018 | 1.15 (1.1,1.2)      | 6.98E-11 |
| P320TR2  | 20 cm narrow walk (trial 2). Did participant stay inside the lines? 1 if yes, 0 otherwise.                                                           | 3034 | 0.685 (0.611,0.767) | 7.06E-11 |
| ITAREA   | Inter trochanter area (cm-sq)                                                                                                                        | 3040 | 1.04 (1.03,1.05)    | 8.01E-11 |
| CHR5PACE | Chair stands per second (i.e., number of chair stands completed in 5 seconds divided by 5)                                                           | 3028 | 0.222 (0.141,0.35)  | 8.43E-11 |
| NWSCORE  | EPESE category for narrow walk. 1 if category 4 (best performance), 0 otherwise.                                                                     | 3044 | 0.692 (0.619,0.774) | 9.35E-11 |
| P3TR1    | Standing balance (Trial 1): I would like you to try to stand on one                                                                                  | 2961 | 0.62 (0.536,0.718)  | 1.5E-10  |

|           |                                                                                                                                                                                                                                                                         |      |                     |          |
|-----------|-------------------------------------------------------------------------------------------------------------------------------------------------------------------------------------------------------------------------------------------------------------------------|------|---------------------|----------|
|           | leg for 30 seconds. You may stand on either leg, whichever is more comfortable. Try to hold your foot up until I say stop. If you lose your balance put your foot down. 1 if participant holds position for 30 seconds, 0 otherwise.                                    |      |                     |          |
| BQUWOWRW  | At the present time, do you feel like you are underweight, about the right weight, or overweight? 1 if "overweight", 0 otherwise.                                                                                                                                       | 3062 | 0.711 (0.64,0.789)  | 1.63E-10 |
| ABVFD     | Abdomen visceral fat density (HU)                                                                                                                                                                                                                                       | 2954 | 1.02 (1.01,1.02)    | 2.95E-10 |
| CSAINDEX  | Climbing stairs ability index (0 = unable; 9 = easy)                                                                                                                                                                                                                    | 2961 | 0.898 (0.869,0.929) | 3.07E-10 |
| GLUCOSE1  | Serum glucose (mg/dL)                                                                                                                                                                                                                                                   | 3040 | 1 (1,1)             | 3.12E-10 |
| HTOTAREA  | Hip total area (cm-sq)                                                                                                                                                                                                                                                  | 3040 | 1.03 (1.02,1.03)    | 3.61E-10 |
| RTHBONE   | Right thigh bone area (cm-sq)                                                                                                                                                                                                                                           | 3019 | 1.15 (1.1,1.19)     | 4.68E-10 |
| DID6MNW   | Was the 6 m narrow walk completed? 1 if yes, 0 otherwise.                                                                                                                                                                                                               | 3046 | 0.655 (0.573,0.749) | 5.44E-10 |
| LPFIMF    | Do you (are your husband/wife/partner) own any stock or stock mutual funds? 1 if no, 0 otherwise.                                                                                                                                                                       | 3027 | 1.4 (1.26,1.56)     | 8.32E-10 |
| MHCSSURG  | Have you ever had any medical or surgical procedure in your heart, neck or blood vessels, such as angioplasty or bypass surgery? 1 if yes, 0 otherwise.                                                                                                                 | 3067 | 1.51 (1.32,1.72)    | 8.63E-10 |
| PM50CUR   | Percent weight change from age 50 to baseline exam                                                                                                                                                                                                                      | 2961 | 0.987 (0.983,0.991) | 9.29E-10 |
| HHKKWK    | Kcal/kg/week doing household chore                                                                                                                                                                                                                                      | 3067 | 0.995 (0.993,0.996) | 9.97E-10 |
| Y1nitrat  | Indicator variable for antianginal medications. 1 if yes, 0 otherwise.                                                                                                                                                                                                  | 3058 | 1.83 (1.5,2.22)     | 1.01E-09 |
| FPHSTAT   | In general, how would you say your health is? 1 if "fair", 0 otherwise.                                                                                                                                                                                                 | 3066 | 1.51 (1.32,1.72)    | 1.02E-09 |
| LPMIRA    | Do you (and your husband/wife/partner) own an IRA or a KEOGH account? 1 if no, 0 otherwise.                                                                                                                                                                             | 3030 | 1.4 (1.26,1.57)     | 1.36E-09 |
| OMUTEETH  | Do you have any remaining natural teeth? 1 if yes, 0 otherwise.                                                                                                                                                                                                         | 3060 | 0.693 (0.615,0.78)  | 1.46E-09 |
| BQWTMAX   | What is the most you've ever weighed?                                                                                                                                                                                                                                   | 3049 | 1 (1,1.01)          | 1.6E-09  |
| FAST8GLU1 | Fasting serum glucose (mg/dL)                                                                                                                                                                                                                                           | 2972 | 1 (1,1)             | 1.63E-09 |
| RTHSFA    | Right thigh subcutaneous fat area (cm-sq)                                                                                                                                                                                                                               | 3008 | 0.996 (0.995,0.997) | 2.01E-09 |
| BQDA5XDA  | Was there ever a time in your life when you drank 5 or more drinks of any kind of alcoholic beverage almost every day? 1 if yes, 0 otherwise.                                                                                                                           | 3064 | 1.6 (1.38,1.87)     | 2.05E-09 |
| RACE      | Race. 1 if "black", 0 if "white"                                                                                                                                                                                                                                        | 3067 | 1.37 (1.24,1.52)    | 2.31E-09 |
| P3STS     | Semi-tandem stand: I would like you to try to stand with the side of the heel of one foot touching the big toe of the other foot for about 30 seconds. You may put either foot in front, whichever is more comfortable. You can use your arms and body to maintain your | 3057 | 0.623 (0.533,0.728) | 2.42E-09 |

|            |                                                                                                                                                                                                                                                                       |      |                     |             |
|------------|-----------------------------------------------------------------------------------------------------------------------------------------------------------------------------------------------------------------------------------------------------------------------|------|---------------------|-------------|
|            | balance. Try to hold your feet in position until I say stop. 1 if participant holds position for 30 seconds, 0 otherwise.                                                                                                                                             |      |                     |             |
| EASE2F     | Ease climbing two flights of stairs (0 = difficult; 3 = very easy)                                                                                                                                                                                                    | 2961 | 0.87 (0.831,0.911)  | 2.63E-09    |
| LPFIMMA    | Do you (and your husband/wife/partner) own a money market account? 1 if no, 0 otherwise.                                                                                                                                                                              | 3027 | 1.4 (1.25,1.56)     | 2.81E-09    |
| CAT5CS     | EPESE score for chair stands. 1 if score is zero (worst performance), 0 otherwise.                                                                                                                                                                                    | 3028 | 1.44 (1.27,1.62)    | 2.97E-09    |
| Y1calcm    | Indicator for calcium supplement. 1 if yes, 0 otherwise.                                                                                                                                                                                                              | 3058 | 0.633 (0.544,0.737) | 3.68E-09    |
| THSFA      | Total (R+L) thigh cutaneous fat area (cm-sq)                                                                                                                                                                                                                          | 3008 | 0.998 (0.998,0.999) | 4.24E-09    |
| BQWT50     | What was your usual weight at about age 50? If you don't remember exactly, please make your best guess                                                                                                                                                                | 2967 | 1 (1,1.01)          | 5.05E-09    |
| EXCLUDE1   | Were there reasons to exclude the participant from completing the long distance corridor walk (e.g., ECG abnormality, elevated standing blood pressure, cardiac surgery, worsening cardiac symptoms, elevated heart rate, missing ECG reading)? 1 if no, 0 otherwise. | 3067 | 0.656 (0.569,0.757) | 6.62E-09    |
| P4BORN     | Teng MMS, Question 1c. What year were you born?                                                                                                                                                                                                                       | 3052 | 1.7 (1.42,2.04)     | 6.74E-09    |
| BQSHNAPS   | During a usual week, how many times do you nap for 5 minutes or more?                                                                                                                                                                                                 | 2997 | 1.03 (1.02,1.05)    | 7.14E-09    |
| FREE_TEST1 | Serum free testosterone (pg/mL)                                                                                                                                                                                                                                       | 3017 | 1.03 (1.02,1.05)    | 0.000000011 |
| LTHSFA     | Left thigh subcutaneous fat area (cm-sq)                                                                                                                                                                                                                              | 3008 | 0.996 (0.995,0.998) | 0.000000011 |
| P3UP2      | Balance walks (usual pace, trial 2): Number of steps. I want you to walk down the hall normally, at a comfortable pace, ignoring the colored lines.                                                                                                                   | 3046 | 1.09 (1.06,1.12)    | 1.13E-08    |
| P4SHRM     | Teng MMS, Question 5a. What three words did I ask you to remember earlier? 1 if participant spontaneously recalls the word "shirt", 0 otherwise.                                                                                                                      | 3058 | 0.72 (0.643,0.806)  | 1.23E-08    |
| RTHSFSD    | Right thigh subcutaneous fat density standard deviation (HU)                                                                                                                                                                                                          | 3008 | 1.03 (1.02,1.04)    | 1.29E-08    |
| ALK_PHOS1  | Serum alkaline phosphatase (U/L)                                                                                                                                                                                                                                      | 3041 | 1 (1,1)             | 1.34E-08    |
| MHHCCVA    | Has a Dr. ever told you that you had stroke, CVA or cerebrovascular accident? 1 if yes, 0 otherwise.                                                                                                                                                                  | 3066 | 0.486 (0.379,0.624) | 1.56E-08    |
| PPB12CAT   | HABCPPB category. 1 if category 9 ( $2.66 < \text{HABCPPB} \leq 3.0$ ), 0 otherwise.                                                                                                                                                                                  | 2950 | 0.604 (0.506,0.72)  | 1.79E-08    |
| MHLCEMPH   | Has a Dr. ever told you that you had emphysema? 1 is yes, 0 otherwise.                                                                                                                                                                                                | 3066 | 1.96 (1.55,2.48)    | 1.88E-08    |
| P4HNRM     | Teng MMS, Question 5c. What three words did I ask you to                                                                                                                                                                                                              | 3057 | 0.742 (0.668,0.824) | 2.55E-08    |

|            |                                                                                                                                                                                                                                                                                                                                                                         |      |                     |             |
|------------|-------------------------------------------------------------------------------------------------------------------------------------------------------------------------------------------------------------------------------------------------------------------------------------------------------------------------------------------------------------------------|------|---------------------|-------------|
|            | remember earlier? 1 if participant spontaneously recalls the word "honesty", 0 otherwise.                                                                                                                                                                                                                                                                               |      |                     |             |
| Y1antang   | Indicator variable for antianginal meds. 1 if yes, 0 otherwise.                                                                                                                                                                                                                                                                                                         | 3058 | 1.35 (1.22,1.51)    | 2.58E-08    |
| P2AAPR     | Was it possible to obtain ankle-arm blood pressure? 1 if yes, 0 otherwise.                                                                                                                                                                                                                                                                                              | 3055 | 0.587 (0.487,0.708) | 0.000000026 |
| CRP_CALIB1 | Serum C reactive protein (um/mL) (recalibrated for longitudinal comparison with measures generated by Wake Forest)                                                                                                                                                                                                                                                      | 3031 | 1 (1,1)             | 3.34E-08    |
| BQMORE     | Did you ever drink more than you do now? 1 if no, 0 otherwise.                                                                                                                                                                                                                                                                                                          | 3066 | 0.747 (0.673,0.83)  | 0.000000047 |
| P4TST      | Indicator for ability to complete sample DSST. 1 if yes, 0 otherwise.                                                                                                                                                                                                                                                                                                   | 3056 | 0.519 (0.41,0.657)  | 5.17E-08    |
| P2POPS     | Pulse obliteration level (palpated systolic) (mmHg)                                                                                                                                                                                                                                                                                                                     | 3067 | 1.01 (1,1.01)       | 5.29E-08    |
| THIMFDavg  | Thigh intermuscular fat density (HU) (left and right average)                                                                                                                                                                                                                                                                                                           | 3008 | 1.01 (1.01,1.02)    | 6.15E-08    |
| P2RL3      | Was isokinetic strength test (kin-com) completed? 1 if no, 0 otherwise.                                                                                                                                                                                                                                                                                                 | 2981 | 1.53 (1.31,1.78)    | 6.43E-08    |
| QMI        | Indicator for presence of Q-wave myocardial infarction. 1 if yes, 0 otherwise.                                                                                                                                                                                                                                                                                          | 3067 | 1.79 (1.45,2.21)    | 7.05E-08    |
| LTHIMFD    | Left thigh intermuscular fat density (HU)                                                                                                                                                                                                                                                                                                                               | 3008 | 1.01 (1.01,1.02)    | 7.22E-08    |
| EDUC       | Less than high school education? 1 if yes, 0 otherwise.                                                                                                                                                                                                                                                                                                                 | 3059 | 1.37 (1.22,1.54)    | 7.96E-08    |
| MHHCHBP    | Has a doctor ever told you that you have hypertension or high blood pressure? 1 if no, 0 otherwise.                                                                                                                                                                                                                                                                     | 3067 | 0.75 (0.675,0.833)  | 8.02E-08    |
| Y1hypgly   | Indicator for oral hypoglycemics. 1 if yes, 0 otherwise.                                                                                                                                                                                                                                                                                                                | 3058 | 1.55 (1.32,1.81)    | 8.91E-08    |
| P3TS1      | Tandem stand (trial 1). Now I would like you to try to stand with the heel of one foot in front of and touching the toes of the other foot. You may use your arms and body to maintain your balance. Try to hold your feet in position until I say stop. If you lose your balance, take a step, like this. 1 if participant holds position for 30 seconds, 0 otherwise. | 3047 | 0.751 (0.675,0.835) | 0.000000108 |
| P2AARB1    | Systolic blood pressure measurement # 1 (brachial / arm)                                                                                                                                                                                                                                                                                                                | 3041 | 1.01 (1,1.01)       | 0.00000012  |
| RLEGFAT    | Right leg fat (gm)                                                                                                                                                                                                                                                                                                                                                      | 3042 | 1 (1,1)             | 0.000000121 |
| RTHIMFD    | Right thigh intermuscular fat density (HU)                                                                                                                                                                                                                                                                                                                              | 3008 | 1.01 (1.01,1.02)    | 0.000000126 |
| LARMAREA   | Left arm area (cm-sq)                                                                                                                                                                                                                                                                                                                                                   | 3040 | 1 (1,1)             | 0.000000138 |
| P4OUT      | Please write the following sentence: I would like to go out. 1 if participant correctly writes the word "out", 0 otherwise.                                                                                                                                                                                                                                             | 3049 | 0.472 (0.356,0.624) | 0.000000143 |
| BQAPPET    | In the past month, would you say that your appetite or desire to eat has been...? 1 if "very good", 0 otherwise.                                                                                                                                                                                                                                                        | 3065 | 0.756 (0.681,0.839) | 0.000000155 |
| LEGFATavg  | Average leg fat (left and right) (gm)                                                                                                                                                                                                                                                                                                                                   | 3041 | 1 (1,1)             | 0.000000163 |



|          |                                                                                                                                                                                                                                                                              |      |                     |             |
|----------|------------------------------------------------------------------------------------------------------------------------------------------------------------------------------------------------------------------------------------------------------------------------------|------|---------------------|-------------|
| P3UP1    | Balance walks (usual pace, trial 1): Number of steps. I want you to walk down the hall normally, at a comfortable pace, ignoring the colored lines.                                                                                                                          | 3047 | 1.08 (1.05,1.11)    | 0.000000178 |
| LLNFEV1R | Lower limit of normal for FEV1/FVC (FEV1: forced expiratory volume in one second; FVC: forced vital capacity)                                                                                                                                                                | 3067 | 0.902 (0.867,0.938) | 0.000000211 |
| LARMLEAN | Left arm fat-free mass (gm)                                                                                                                                                                                                                                                  | 3040 | 1 (1,1)             | 0.000000226 |
| P4SH2    | Teng MMS, Question 17a. What three words did I ask you to remember earlier? 1 if participant correctly recalls the word "shirt", 0 otherwise.                                                                                                                                | 3055 | 0.743 (0.664,0.832) | 0.000000226 |
| P4ETSL   | Teng MMS, Question 10c. In what way are eating and sleeping alike? 1 if "not attempted/disabled", 0 otherwise.                                                                                                                                                               | 3058 | 1.36 (1.21,1.52)    | 0.000000239 |
| LLEGFAT  | Left leg fat (gm)                                                                                                                                                                                                                                                            | 3043 | 1 (1,1)             | 0.00000026  |
| Y1hbpdrg | Indicator variable for any antihypertensive agent. 1 if yes, 0 otherwise.                                                                                                                                                                                                    | 3058 | 1.32 (1.19,1.47)    | 0.000000275 |
| LPFICASA | Please tell me if you (and your husband/wife/partner) own a checking or savings account. 1 if no, 0 otherwise.                                                                                                                                                               | 3032 | 1.75 (1.41,2.17)    | 0.000000289 |
| TOTKKWK  | Total Kcal/kg/week                                                                                                                                                                                                                                                           | 3067 | 0.998 (0.997,0.999) | 0.000000298 |
| Y1UWSCR  | EPESE walking speed category. 1 if category 4 (best performance), 0 otherwise.                                                                                                                                                                                               | 3047 | 0.601 (0.494,0.73)  | 0.000000322 |
| CHEADLEA | Head lean (gm)                                                                                                                                                                                                                                                               | 3048 | 1 (1,1)             | 0.000000327 |
| ITBMC    | Inter trochanter bone mineral content (gm)                                                                                                                                                                                                                                   | 3040 | 1.02 (1.01,1.03)    | 0.00000033  |
| LARMBMC  | Left arm bone mineral content (gm)                                                                                                                                                                                                                                           | 3040 | 1 (1,1)             | 0.000000342 |
| Y1chfdiu | Indicator for diuretic medication for congestive heart failure. 1 is yes, 0 otherwise.                                                                                                                                                                                       | 3058 | 1.41 (1.23,1.6)     | 0.000000344 |
| EASE1F   | Ease climbing one flight of stairs (0 = unable; 6 = very easy)                                                                                                                                                                                                               | 2963 | 0.8 (0.734,0.872)   | 0.000000349 |
| CLARMLEA | Left Arm lean (gm)                                                                                                                                                                                                                                                           | 3048 | 1 (1,1)             | 0.000000356 |
| LPFIIN25 | The following question refers to your personal family income for the last year including all sources such as wages, salaries, Social Security or retirement benefits, help from relatives, rent from property and so forth. Was it more than \$25,000? 1 if no, 0 otherwise. | 3040 | 1.31 (1.18,1.46)    | 0.000000363 |
| P4GO     | Teng MMS, Question 14. Please write the following sentence: I would like to go out. 1 if participant correctly writes the word "go", 0 otherwise.                                                                                                                            | 3049 | 0.561 (0.449,0.701) | 0.000000393 |
| Y1insuln | Indicator for insulin medications. 1 if yes, 0 otherwise.                                                                                                                                                                                                                    | 3058 | 1.78 (1.42,2.23)    | 0.000000472 |
| Y1antarr | Indicator variable for antiarrhythmic medications. 1 if yes, 0                                                                                                                                                                                                               | 3058 | 1.35 (1.2,1.51)     | 0.000000577 |

|          |                                                                                                                                                                                                |      |                     |             |
|----------|------------------------------------------------------------------------------------------------------------------------------------------------------------------------------------------------|------|---------------------|-------------|
|          | otherwise.                                                                                                                                                                                     |      |                     |             |
| HQSUPCOV | In addition to Medicare, do you have a health insurance plan, Medigap, or other supplemental coverage which pays for any part of a hospital, doctor's or surgeon's bill? 1 if no, 0 otherwise. | 3065 | 1.37 (1.21,1.56)    | 0.000000627 |
| RARMAREA | Right arm area (cm <sup>2</sup> )                                                                                                                                                              | 3028 | 1 (1,1)             | 0.000000743 |
| RARMLEAN | Right arm fat-free mass (gm)                                                                                                                                                                   | 3027 | 1 (1,1)             | 0.000000763 |
| RARMBMC  | Right arm bone mineral content (gm)                                                                                                                                                            | 3028 | 1 (1,1)             | 0.000000772 |
| THSCLOC  | Thigh CT scan location (mm) (location of the thigh image plane, measured from the medial edge of the greater trochanter on the CT scout image)                                                 | 3002 | 1.01 (1,1.01)       | 0.00000082  |
| LTHSFSD  | L thigh subcutaneous fat density standard deviation (HU)                                                                                                                                       | 3008 | 1.03 (1.02,1.04)    | 0.000000831 |
| P2SH2    | Standing height: measurement 2 (mm)                                                                                                                                                            | 3064 | 1 (1,1)             | 0.000000836 |
| P4TO     | Teng MMS, Question 14. Please write the following sentence: I would like to go out. 1 if participant correctly writes the word "to", 0 otherwise.                                              | 3049 | 0.59 (0.479,0.728)  | 0.000000844 |
| P2AADOP  | Ankle-arm blood pressure: Doppler Systolic (mm Hg)                                                                                                                                             | 3032 | 1.01 (1,1.01)       | 0.000000919 |
| LTHIMFSD | Left thigh intermuscular fat density standard deviation (HU)                                                                                                                                   | 3008 | 0.95 (0.931,0.97)   | 0.000000952 |
| P2AAMX   | Ankle-arm blood pressure: maximal inflation level                                                                                                                                              | 3032 | 1.01 (1,1.01)       | 0.00000102  |
| QWVAB    | Q-wave myocardial infarction. 1 if absent, 0 otherwise.                                                                                                                                        | 3067 | 0.684 (0.587,0.797) | 0.00000113  |
| CRARMLEA | Right Arm lean (gm)                                                                                                                                                                            | 3048 | 1 (1,1)             | 0.00000117  |
| FPLWKKWK | Kcal/kg/week doing light housework                                                                                                                                                             | 3066 | 0.993 (0.99,0.996)  | 0.00000122  |
| Q_ANT    | Q wave on ECG (leads V1, V2, V3, V4, V5). 1 if no, 0 otherwise.                                                                                                                                | 3067 | 0.561 (0.443,0.711) | 0.00000158  |
| CTRNKLEA | Trunk lean (gm)                                                                                                                                                                                | 3018 | 1 (1,1)             | 0.00000168  |
| LPFIFIN  | How well does the amount of money you (and your husband/wife/partner) have take care of your needs -- poorly, fairly well, or very well? 1 if "poorly", 0 otherwise.                           | 3044 | 1.62 (1.33,1.97)    | 0.00000171  |
| CTOTLEAN | Total Lean (gm)                                                                                                                                                                                | 3051 | 1 (1,1)             | 0.0000019   |
| HEADLEAN | Head fat-free mass (gm)                                                                                                                                                                        | 3042 | 1 (1,1)             | 0.00000196  |
| TAREA    | Trochanter Area                                                                                                                                                                                | 3040 | 1.06 (1.04,1.09)    | 0.00000201  |
| P2SH     | Standing height (average of 2 measurements) (mm)                                                                                                                                               | 3067 | 1 (1,1)             | 0.00000221  |
| P4PENT1  | Teng MMS, Question 15a. Here is a drawing. Please copy the drawing onto this piece of paper. 1 if "nonpentagon enclosed figure", 0 otherwise.                                                  | 3050 | 1.58 (1.31,1.91)    | 0.00000222  |
| P2SH1    | Standing height: measurement 1 (mm)                                                                                                                                                            | 3067 | 1 (1,1)             | 0.00000254  |
| MHLCCOPD | Has a doctor ever told you that you had chronic obstructive lung                                                                                                                               | 3065 | 0.486 (0.36,0.657)  | 0.00000263  |

|                |                                                                                                                                                                                                                                                                   |      |                     |            |
|----------------|-------------------------------------------------------------------------------------------------------------------------------------------------------------------------------------------------------------------------------------------------------------------|------|---------------------|------------|
|                | disease or COPD? 1 if no, 0 otherwise.                                                                                                                                                                                                                            |      |                     |            |
| STWVAB         | Major ST or T wave. 1 if abnormal, 0 otherwise.                                                                                                                                                                                                                   | 3067 | 1.46 (1.25,1.71)    | 0.00000266 |
| FPGSKKWK       | Kcal/kg/week grocery shopping                                                                                                                                                                                                                                     | 3067 | 0.977 (0.968,0.987) | 0.00000307 |
| LPIADQ         | In general, how do your finances usually work out at the end of the month? Do you find that you usually end up with some money left over, just enough to make ends meet, or not enough money to make ends meet? 1 if "not enough to make ends meet", 0 otherwise. | 3036 | 1.72 (1.37,2.17)    | 0.00000312 |
| HTOTBMC        | Hip total bone mineral content (gm)                                                                                                                                                                                                                               | 3040 | 1.01 (1.01,1.02)    | 0.00000328 |
| TOTFAT         | Total fat (gm)                                                                                                                                                                                                                                                    | 3051 | 1 (1,1)             | 0.00000338 |
| CHOLESI        | Plasma total cholesterol (mg/dL)                                                                                                                                                                                                                                  | 3034 | 0.997 (0.995,0.998) | 0.00000344 |
| NULL19P_773837 | Chromosome 19p null SNP (rs773837)                                                                                                                                                                                                                                | 2927 | 0.772 (0.692,0.861) | 0.00000361 |
| P2AARB2        | Ankle-arm blood pressure: Brachial measurement # 2 (mm Hg)                                                                                                                                                                                                        | 3017 | 1.01 (1,1.01)       | 0.00000428 |
| P4ARLG         | Teng MMS, Question 10a. In what way are an arm and a leg alike? 1 if "error/refused", 0 otherwise.                                                                                                                                                                | 3057 | 1.38 (1.2,1.58)     | 0.00000431 |
| TOTLEAN        | Total fat-free mass (gm)                                                                                                                                                                                                                                          | 2959 | 1 (1,1)             | 0.00000535 |
| HEADFAT        | Head fat (gm)                                                                                                                                                                                                                                                     | 3048 | 1 (1,1)             | 0.00000551 |
| DRINKER1       | Drinking history at baseline. 1 if "former", 0 otherwise.                                                                                                                                                                                                         | 3053 | 1.31 (1.17,1.48)    | 0.00000778 |
| RTHIMFSD       | Right thigh intermuscular fat density standard deviation (HU)                                                                                                                                                                                                     | 3008 | 0.954 (0.934,0.974) | 0.00000787 |
| P4WLD          | Teng MMS, question 14. Please write the following sentence: I would like to go out. 1 if participant correctly writes the word "would", 0 otherwise.                                                                                                              | 3050 | 0.632 (0.516,0.773) | 0.00000838 |
| HQRRELIG       | What is your religious preference? 1 if "Jewish", 0 otherwise.                                                                                                                                                                                                    | 3059 | 0.598 (0.476,0.75)  | 0.00000884 |
| BQNOFAT        | Are there days when you don't feel like eating at all? 1 if yes, 0 otherwise.                                                                                                                                                                                     | 3066 | 1.45 (1.23,1.71)    | 0.00000985 |
| OMESREAD       | Wearing glasses or contact lenses if you use them, how much difficulty do you have reading ordinary print in newspapers? 1 if "no difficulty at all", 0 otherwise.                                                                                                | 3063 | 0.744 (0.652,0.848) | 0.00000992 |
| LPFEAT         | During the past week, how often did you not feel like eating or have a poor appetite? 1 if "rarely or none of the time", 0 otherwise.                                                                                                                             | 3060 | 0.694 (0.59,0.816)  | 0.0000101  |
| P2AARP1        | Ankle-arm blood pressure: right posterior tibial, measurement # 1 (mm Hg)                                                                                                                                                                                         | 2961 | 0.996 (0.994,0.998) | 0.0000105  |
| LLATAB         | Area of region defined as left lateral abdominal muscles in the abdominal CT image                                                                                                                                                                                | 2951 | 1.02 (1.01,1.03)    | 0.0000108  |
| Y1puldrg       | Indicator variable for pulmonary medications. 1 if yes, 0 otherwise.                                                                                                                                                                                              | 3058 | 1.57 (1.28,1.93)    | 0.0000113  |
| EASEUP         | Ease rising from chair (0 = least easy; 6 = easiest)                                                                                                                                                                                                              | 3064 | 0.915 (0.88,0.952)  | 0.0000115  |
| MHLCSBUP       | Are you troubled by shortness of breath when hurrying on a level                                                                                                                                                                                                  | 3062 | 0.785 (0.704,0.875) | 0.0000125  |

|            |                                                                                                                                                                                                                  |      |                     |           |
|------------|------------------------------------------------------------------------------------------------------------------------------------------------------------------------------------------------------------------|------|---------------------|-----------|
|            | surface or walking up a slight hill? 1 if "no", 0 otherwise.                                                                                                                                                     |      |                     |           |
| P4PENT2    | Teng MMS, Question 15b. Here is a drawing. Please copy the drawing onto this piece of paper. 1 if "nonpentagon enclosed figure", 0 otherwise.                                                                    | 3050 | 1.46 (1.23,1.73)    | 0.000013  |
| FAST8CHOL1 | Fasting total plasma cholesterol (mg/dL)                                                                                                                                                                         | 2962 | 0.997 (0.995,0.998) | 0.000014  |
| ARYTHTYP   | Other type of arrhythmia (not persistent atrial fib. or flutter, intermittent atrial fib. or flutter, sinus bradycardia, Freq. premature vent. beats, persistent ventricular rhythm). 1 if present, 0 otherwise. | 3067 | 1.63 (1.31,2.03)    | 0.0000142 |
| P4CRD1     | Teng MMS, Question 13. Hold up card #1 and say "Please do this" (close your eyes). 1 if participant closes eyes without prompting, 0 otherwise.                                                                  | 3052 | 0.688 (0.581,0.815) | 0.0000156 |
| OMUDENT    | Do you wear dentures? 1 if yes, 0 otherwise.                                                                                                                                                                     | 3056 | 1.26 (1.14,1.4)     | 0.0000161 |
| Y1cachbk   | Indicator variable for antianginal medications. 1 if yes, 0 otherwise.                                                                                                                                           | 3058 | 1.3 (1.15,1.46)     | 0.0000167 |
| LPSCHOOL   | Highest grade of school completed                                                                                                                                                                                | 3064 | 0.966 (0.951,0.982) | 0.0000199 |
| MHCSLGN    | Do you get a pain or discomfort in your leg(s) when you walk? 1 if yes, 0 otherwise.                                                                                                                             | 3065 | 1.3 (1.15,1.47)     | 0.0000204 |
| RARMBMD    | Right arm bone mineral density (gm/cm <sup>2</sup> )                                                                                                                                                             | 3028 | 2.5 (1.64,3.8)      | 0.0000207 |
| LARMFAT    | Left arm fat (gm)                                                                                                                                                                                                | 3048 | 1 (1,1)             | 0.000022  |
| AXISAB     | Axis abnormality. 1 if absent, 0 otherwise.                                                                                                                                                                      | 3063 | 0.66 (0.544,0.8)    | 0.000024  |
| P2AALP2    | Ankle-arm blood pressure: Left posterior tibial, measurement # 2 (mm Hg)                                                                                                                                         | 2939 | 0.996 (0.994,0.998) | 0.0000249 |
| LATAB      | Total (right + left) lateral abdominal muscle area (cm-sq)                                                                                                                                                       | 2950 | 1.01 (1,1.01)       | 0.0000265 |
| PELVAREA   | Pelvic area (cm <sup>2</sup> )                                                                                                                                                                                   | 2989 | 1 (1,1)             | 0.0000267 |
| P3TH1      | Thigh circumference: measurement 1                                                                                                                                                                               | 3062 | 0.982 (0.974,0.99)  | 0.0000277 |
| P2AALP1    | Ankle-arm blood pressure : left posterior tibial, measurement # 1 (mm Hg)                                                                                                                                        | 2941 | 0.996 (0.995,0.998) | 0.0000312 |
| ROSEIC     | Rose intermittent claudication score (summary variable from a standard questionnaire on chest pain and intermittent claudication created by Geoffrey Rose et al.)                                                | 3052 | 1.15 (1.07,1.23)    | 0.0000373 |
| P3TH       | Average of baseline thigh circumference measurements (cm)                                                                                                                                                        | 3063 | 0.983 (0.974,0.991) | 0.0000406 |
| FPVWCURV   | Do you currently do volunteer work? 1 if no, 0 otherwise.                                                                                                                                                        | 3065 | 1.25 (1.12,1.4)     | 0.0000422 |
| Y1bronch   | Indicator variable for bronchodilator medications. 1 if yes, 0 otherwise.                                                                                                                                        | 3058 | 1.64 (1.29,2.07)    | 0.0000424 |
| CHSindex   | Cumulative number of Cardiovascular Health Study (CHS frailty) index deficits (0, 1, 2, 3, 4, or 5)                                                                                                              | 2885 | 2.3 (1.54,3.43)     | 0.0000427 |
| LPSOSD     | Left psoas density standard deviation (HU)                                                                                                                                                                       | 2954 | 0.962 (0.944,0.98)  | 0.0000442 |

|               |                                                                                                                                                                                                                                                        |      |                     |           |
|---------------|--------------------------------------------------------------------------------------------------------------------------------------------------------------------------------------------------------------------------------------------------------|------|---------------------|-----------|
| MHHCICPL      | Has a Dr. ever told you that you have intermittent claudication or pain in your legs from a blockage of the arteries? 1 if yes, 0 otherwise.                                                                                                           | 3065 | 1.59 (1.27,1.99)    | 0.000045  |
| P2SY2         | Sitting systolic blood pressure measurement # 2                                                                                                                                                                                                        | 3066 | 1 (1,1.01)          | 0.0000479 |
| LESSOQM       | Does participant "walk 1/4 mile less often". 1 if yes, 0 otherwise.                                                                                                                                                                                    | 2946 | 1.34 (1.16,1.54)    | 0.000048  |
| P3TH2         | Thigh circumference: measurement 2                                                                                                                                                                                                                     | 3061 | 0.983 (0.974,0.991) | 0.0000494 |
| SYSBP         | Sitting systolic blood pressure, average of two measurements                                                                                                                                                                                           | 3067 | 1 (1,1.01)          | 0.0000495 |
| EASEHHW       | Ease doing housework (0 = least easy; 6 = easiest)                                                                                                                                                                                                     | 3054 | 0.93 (0.898,0.964)  | 0.0000535 |
| LARMBMD       | Left arm bone mineral density (gm/cm <sup>2</sup> )                                                                                                                                                                                                    | 3040 | 2.46 (1.59,3.81)    | 0.0000556 |
| LESSOIF       | Does participant "climb stairs less often". 1 if yes, 0 otherwise.                                                                                                                                                                                     | 2949 | 1.4 (1.19,1.66)     | 0.0000565 |
| BQAPP1YR      | Compared to one year ago, how would you rate your appetite or desire to eat? 1 if "about the same as one year ago", 0 otherwise.                                                                                                                       | 3067 | 0.746 (0.646,0.86)  | 0.0000578 |
| TIREQDM       | Does participant "get tired walking 1/4 mile"? 1 if yes, 0 otherwise.                                                                                                                                                                                  | 2949 | 1.38 (1.18,1.61)    | 0.0000628 |
| P2SYS         | Sitting systolic blood pressure measurement # 1                                                                                                                                                                                                        | 3067 | 1 (1,1.01)          | 0.0000668 |
| HQSSHEAD      | Who is the head of your household? 1 if "self", 0 otherwise.                                                                                                                                                                                           | 3029 | 1.29 (1.14,1.47)    | 0.0000726 |
| EASE20P       | Ease lift/carry 20 pounds (0 = difficult; 3 = very easy)                                                                                                                                                                                               | 3063 | 0.92 (0.882,0.959)  | 0.0000756 |
| P2AARP2       | Ankle-Arm blood pressure: right posterior tibial, measurement # 2 (mm Hg)                                                                                                                                                                              | 2954 | 0.997 (0.995,0.998) | 0.0000758 |
| CLLEGLEA      | Left Leg lean (gm)                                                                                                                                                                                                                                     | 3043 | 1 (1,1)             | 0.0000774 |
| HQSSIDOP      | When you have an important decision to make, do you have someone to talk to about it? 1 if "always of very often", 0 otherwise.                                                                                                                        | 3060 | 0.786 (0.698,0.886) | 0.0000811 |
| LTHMUSD       | Left thigh total muscle density (HU)                                                                                                                                                                                                                   | 3008 | 0.985 (0.978,0.993) | 0.0000852 |
| IL1RN_3213448 | Interleukin 1 receptor antagonist (rs3213448)                                                                                                                                                                                                          | 2929 | 1.68 (1.3,2.18)     | 0.0000858 |
| MHHCAPCP      | Has a Dr. ever told you that you have angina pectoris or chest pain due to heart disease? 1 if yes, 0 otherwise.                                                                                                                                       | 3064 | 0.752 (0.651,0.868) | 0.0000975 |
| BQHT25IN      | How tall were you without shoes at about age 25? If you don't remember exactly, please make your best guess.                                                                                                                                           | 3004 | 1.03 (1.02,1.05)    | 0.0001    |
| BQWTSAT       | At this time, how satisfied are you with your weight? 1 if "very", 0 otherwise.                                                                                                                                                                        | 3065 | 1.25 (1.12,1.4)     | 0.000104  |
| CTSCANID      | CT scanner used. 1 if Centre commons CT scanner, 0 otherwise.                                                                                                                                                                                          | 3020 | 0.813 (0.732,0.904) | 0.000119  |
| CRLEGLEA      | Right Leg lean (gm)                                                                                                                                                                                                                                    | 3042 | 1 (1,1)             | 0.000119  |
| FPHC12MO      | In the past 12 months, did you do heavy or major chores like scrubbing windows or walls, vacuuming, mopping floors, or cleaning gutters; home maintenance activities like painting, scraping, hanging wall paper, or anything like these activities at | 3066 | 0.809 (0.727,0.901) | 0.000119  |

|                   |                                                                                                                                        |      |                     |          |
|-------------------|----------------------------------------------------------------------------------------------------------------------------------------|------|---------------------|----------|
|                   | least 10 times? 1 if yes, 0 otherwise.                                                                                                 |      |                     |          |
| PQBP30DA          | Did you experience any bodily pain in the last 30 days? 1 if yes, 0 otherwise.                                                         | 3067 | 0.81 (0.728,0.902)  | 0.000121 |
| BQSHTFS           | How often do you experience trouble falling asleep? 1 if "rarely", 0 otherwise.                                                        | 3063 | 0.761 (0.661,0.875) | 0.000125 |
| P4TAP1            | Finger tapping test (trial 1). Number of taps in 15 seconds                                                                            | 3035 | 0.992 (0.987,0.996) | 0.000127 |
| Y1orest           | Indicator variable for oral estrogen medication. 1 if yes, 0 otherwise.                                                                | 3058 | 0.703 (0.587,0.842) | 0.000127 |
| BQDFSHOP          | Because of a health or physical problem, do you have any difficulty shopping for food? 1 if no, 0 otherwise.                           | 3064 | 0.63 (0.498,0.798)  | 0.000128 |
| AGTM235T          | Angiotensin AGT M235T                                                                                                                  | 2926 | 1.24 (1.11,1.38)    | 0.000131 |
| RTHTA             | Right thigh total area (cm-sq)                                                                                                         | 3008 | 0.998 (0.997,0.999) | 0.000137 |
| Y1chfvas          | Indicator variable for vasodilator or ACE inhibitor medications for congestive heart failure. 1 if yes, 0 otherwise.                   | 3058 | 1.28 (1.13,1.45)    | 0.000146 |
| BRISK90           | Does participant "walk briskly $\geq$ 90 min/week". 1 if yes, 0 otherwise.                                                             | 3067 | 0.703 (0.585,0.843) | 0.000147 |
| BQWEATLN          | How many days per week do you eat lunch? 1 if "four", 0 otherwise.                                                                     | 3018 | 1.53 (1.23,1.9)     | 0.000161 |
| P4CITN            | Teng MMS, Question 7c. What city/town are we in? 1 if participant answers correctly, 0 otherwise.                                      | 3054 | 0.262 (0.131,0.525) | 0.000161 |
| PREDPEF           | Predicted peak expiratory flow (ml/sec)                                                                                                | 3067 | 1 (1,1)             | 0.000167 |
| RLATABSD          | Right Lat abdominal density standard deviation (HU)                                                                                    | 2950 | 0.955 (0.932,0.978) | 0.000168 |
| TIRED1F           | Does participant "get tired climbing stairs"? 1 if yes, 0 otherwise.                                                                   | 2954 | 1.39 (1.17,1.64)    | 0.000176 |
| THTA              | Total (right + left) total thigh area (cm-sq)                                                                                          | 3008 | 0.999 (0.998,1)     | 0.000178 |
| HQSSOPID          | When other people have an important decision to make, do they talk to you about it? 1 if "never", 0 otherwise.                         | 3055 | 1.52 (1.22,1.9)     | 0.000191 |
| LCAINDEX          | Lift/carry ability index (0 = unable; 9 = very easy)                                                                                   | 3063 | 0.955 (0.932,0.979) | 0.000201 |
| RLATAB            | Area - Right Lat abdominal (cm-sq)                                                                                                     | 2950 | 1.02 (1.01,1.03)    | 0.000208 |
| SOFindex_Prefrail | Does the participant exhibit prefrailty according to the SOF frailty index (i.e., 1 of 3 deficits are present)? 1 if yes, 0 otherwise. | 3024 | 1.26 (1.11,1.42)    | 0.000216 |
| RLEGLEAN          | Right leg fat-free mass (gm)                                                                                                           | 2924 | 1 (1,1)             | 0.000241 |
| LLEGLEAN          | Left leg fat-free mass (gm)                                                                                                            | 2945 | 1 (1,1)             | 0.000257 |
| LTHTA             | Left thigh total area (cm-sq)                                                                                                          | 3008 | 0.998 (0.997,0.999) | 0.000274 |
| RARMFAT           | Right arm fat (gm)                                                                                                                     | 3048 | 1 (1,1)             | 0.000275 |
| Y1vitd            | Indicator variable for vitamin D supplements. 1 if yes, 0 otherwise.                                                                   | 3058 | 0.679 (0.55,0.837)  | 0.000287 |

|                   |                                                                                                                                                                                                               |      |                     |          |
|-------------------|---------------------------------------------------------------------------------------------------------------------------------------------------------------------------------------------------------------|------|---------------------|----------|
| RLEGBMD           | Right leg bone mineral density (gm/cm <sup>2</sup> )                                                                                                                                                          | 2924 | 1.76 (1.29,2.4)     | 0.000313 |
| Y1aceinh          | Indicator variable for ACE inhibitor medications. 1 if yes, 0 otherwise.                                                                                                                                      | 3058 | 1.28 (1.12,1.47)    | 0.000325 |
| OMESCON           | Do you have glasses or contact lenses? 1 if "yes", 0 otherwise.                                                                                                                                               | 3067 | 0.604 (0.459,0.795) | 0.000327 |
| RRIBBMD           | Right rib bone mineral density (gm/cm <sup>2</sup> )                                                                                                                                                          | 3037 | 2.69 (1.57,4.63)    | 0.000335 |
| FPLW12MO          | In the past 12 months, did you do light work around the house like cooking meals, baking, washing dishes, making beds, straightening up, dusting or light cleaning, at least 10 times? 1 if yes, 0 otherwise. | 3066 | 0.717 (0.596,0.861) | 0.000382 |
| WTOTBMC           | Whole Body Total bone mineral content (gm)                                                                                                                                                                    | 2961 | 1 (1,1)             | 0.000382 |
| LLEGBMC           | Left leg bone mineral content (gm)                                                                                                                                                                            | 2945 | 1 (1,1)             | 0.000387 |
| AGT_6             | Angiotensin AGT-6G/A                                                                                                                                                                                          | 2935 | 1.21 (1.09,1.35)    | 0.000459 |
| DEFICITindex      | Health deficit index. Cumulative number of health deficits (0 - 45)                                                                                                                                           | 2990 | 2.58 (1.52,4.38)    | 0.00046  |
| TWVITMS           | Major T-wave items. 1 if present, 0 otherwise.                                                                                                                                                                | 3067 | 1.41 (1.16,1.71)    | 0.000465 |
| LPFIBUS           | Please tell me if you (and your husband/wife/partner) own a business or farm? 1 if no, 0 otherwise.                                                                                                           | 3029 | 1.32 (1.13,1.54)    | 0.00049  |
| LEPTIN1           | Serum leptin (ng/mL)                                                                                                                                                                                          | 3014 | 0.992 (0.988,0.997) | 0.000494 |
| RTHMUSD           | Right thigh total muscle density (HU)                                                                                                                                                                         | 3008 | 0.987 (0.98,0.994)  | 0.000527 |
| P4INT             | Teng MMS, Question 15c. Here is a drawing. Please copy the drawing onto this piece of paper. 1 if "4-corneredenclosure", 0 otherwise.                                                                         | 3051 | 0.787 (0.688,0.901) | 0.000536 |
| LTHQUD            | Left thigh quadriceps density (HU)                                                                                                                                                                            | 3008 | 0.987 (0.98,0.994)  | 0.000572 |
| P4CNTY            | Teng MMS, Question 7b. What county are we in? 1 if participant answers correctly, 0 otherwise.                                                                                                                | 3056 | 0.614 (0.466,0.811) | 0.000576 |
| OMESCAR           | Are you currently driving? 1 if yes, 0 otherwise.                                                                                                                                                             | 3065 | 0.801 (0.706,0.909) | 0.000586 |
| BQLOSEWT          | At the present time, are you trying to lose weight? 1 if yes, 0 otherwise.                                                                                                                                    | 3065 | 0.806 (0.713,0.911) | 0.000587 |
| LDL1              | Plasma low density lipoprotein (mg/dL)                                                                                                                                                                        | 2992 | 0.997 (0.996,0.999) | 0.000602 |
| P4TAP             | Finger tapping test (average between two trials)                                                                                                                                                              | 3035 | 0.992 (0.987,0.997) | 0.000606 |
| CHSindex_PreFrail | Does the participant exhibit prefrailty according to the CHS frailty index (i.e., 1 of 5 deficits are present)? 1 if yes, 0 otherwise.                                                                        | 2885 | 1.22 (1.09,1.36)    | 0.000629 |
| BQSHWUDN          | "How often do you wake up during the night and have difficulty getting back to sleep? 1 if "never", 0 otherwise.                                                                                              | 3064 | 1.2 (1.08,1.34)     | 0.00069  |
| TRUNKFAT          | Trunk fat (gm)                                                                                                                                                                                                | 3018 | 1 (1,1)             | 0.000695 |
| RLEGBMC           | Right leg bone mineral content (gm)                                                                                                                                                                           | 2924 | 1 (1,1)             | 0.0007   |
| SOFindex          | Cumulative number of Study of Osteoporotic Fractures (SOF)                                                                                                                                                    | 3024 | 1.76 (1.27,2.44)    | 0.000704 |

|          |                                                                                                                                                                                                                                                                                             |      |                     |          |
|----------|---------------------------------------------------------------------------------------------------------------------------------------------------------------------------------------------------------------------------------------------------------------------------------------------|------|---------------------|----------|
|          | deficits (0, 1, 2, or 3)                                                                                                                                                                                                                                                                    |      |                     |          |
| P4CHN    | Teng MMS, Question 8d. Point to the object or a part of your own body and ask the participant to name it (chin). 1 if participant correctly points, 0 otherwise.                                                                                                                            | 3054 | 0.358 (0.197,0.649) | 0.000716 |
| BQDFPREP | Because of a health or physical problem, do you have any difficulty preparing meals? 1 if no, 0 otherwise.                                                                                                                                                                                  | 3064 | 0.724 (0.6,0.873)   | 0.000724 |
| P3SCS    | Single chair stand. This is a test of strength in your legs in which you stand up from sitting without using your arms. Fold your arms across your chest, like this, and stand when I say GO, keeping your arms in this position. OK? Ready, Go! 1 if "not attempted/refused", 0 otherwise. | 3059 | 2.28 (1.41,3.68)    | 0.000739 |
| RTHQUD   | Right thigh quadriceps density (HU)                                                                                                                                                                                                                                                         | 3008 | 0.988 (0.98,0.995)  | 0.000792 |
| FPFS12MO | During the past 12 months, did you walk up a flight of stairs at least 10 times? 1 if yes, 0 otherwise.                                                                                                                                                                                     | 3064 | 0.789 (0.686,0.906) | 0.000828 |
| BQSHMED  | How often do you take sleeping pills or other medication to help you sleep? 1 if "rarely", 0 otherwise.                                                                                                                                                                                     | 3060 | 0.609 (0.455,0.815) | 0.000837 |
| RPSOSD   | Right psoas density standard deviation (HU)                                                                                                                                                                                                                                                 | 2954 | 0.968 (0.95,0.987)  | 0.000864 |
| LPFIIIP  | Please tell me if you (and your husband/wife/partner) own investment property or housing other than where you currently live? 1 if no, 0 otherwise.                                                                                                                                         | 3030 | 1.24 (1.09,1.4)     | 0.00087  |
| P2JR     | Joint replacement other than knee or hip replacement (e.g., shoulder, elbow). 1 if yes, 0 otherwise.                                                                                                                                                                                        | 3038 | 1.99 (1.33,2.97)    | 0.000872 |
| FPCUT12  | During the past 12 months, did you cut down on things you usually do, such as going to work or working around the house, because of illness or injury? 1 if no, 0 otherwise.                                                                                                                | 3061 | 0.799 (0.7,0.912)   | 0.000875 |
| TBMC     | Trochanter bone mineral content                                                                                                                                                                                                                                                             | 3040 | 1.03 (1.01,1.05)    | 0.000891 |
| LLEGBMD  | Left leg bone mineral density (gm/cm2)                                                                                                                                                                                                                                                      | 2945 | 1.67 (1.23,2.26)    | 0.000933 |
| LRIBBMD  | Left rib bone mineral density (gm/cm2)                                                                                                                                                                                                                                                      | 3028 | 2.42 (1.43,4.1)     | 0.000965 |
| P4SPL    | Teng MMS, Question 4. Spell "world". 1 if participant is unable, 0 otherwise.                                                                                                                                                                                                               | 3054 | 1.38 (1.14,1.66)    | 0.001    |
| Y1theoph | Indicator for pulmonary medication use. 1 if yes, 0 otherwise.                                                                                                                                                                                                                              | 3058 | 1.75 (1.25,2.45)    | 0.00109  |
| BQWSCALE | Do you have a scale in your house that you can use to weigh yourself? 1 if yes, 0 otherwise.                                                                                                                                                                                                | 3066 | 0.809 (0.712,0.919) | 0.00113  |
| P2KNRP   | Have you ever had knee replacement surgery where all or part of your joint was replaced? 1 if no, 0 otherwise.                                                                                                                                                                              | 3063 | 0.646 (0.496,0.842) | 0.0012   |
| LSPIBM   | Lumb spine bone mineral content (gm)                                                                                                                                                                                                                                                        | 3046 | 1 (1,1.01)          | 0.00122  |



|                |                                                                                                                                                                                                              |      |                     |         |
|----------------|--------------------------------------------------------------------------------------------------------------------------------------------------------------------------------------------------------------|------|---------------------|---------|
| OMESQUAL       | At the present time, would you say your eyesight (with glasses or contact lenses, if you wear them) is excellent, good, fair, poor, or very poor or are you completely blind? 1 if "excellent", 0 otherwise. | 3066 | 0.8 (0.699,0.916)   | 0.00128 |
| WTOTAREA       | Whole body total area (cm <sup>2</sup> )                                                                                                                                                                     | 2961 | 1 (1,1)             | 0.00128 |
| FPVWCURJ       | Do you currently work for pay, either at a regular job, consulting, or doing odd jobs? 1 if no, 0 otherwise.                                                                                                 | 3063 | 1.23 (1.08,1.39)    | 0.00142 |
| FAST8LDL1      | Fasting plasma LDL (mg/dL)                                                                                                                                                                                   | 2921 | 0.997 (0.996,0.999) | 0.00148 |
| BQSCPOC        | Have you ever smoked a pipe or cigars? 1 if no, 0 otherwise.                                                                                                                                                 | 3067 | 0.833 (0.743,0.933) | 0.00158 |
| LPFHOPE        | During the past week, how often have you felt hopeful about the future? 1 if "rarely", 0 otherwise.                                                                                                          | 3040 | 1.36 (1.12,1.64)    | 0.00162 |
| FPLD12MO       | In the past 12 months, did you do or help with laundry at least 10 times? 1 if no, 0 otherwise.                                                                                                              | 3066 | 1.22 (1.08,1.37)    | 0.00166 |
| P4DAYWK        | Teng MMS, Question 6b. What is the day of the week? 1 if participant answers correctly, 0 otherwise.                                                                                                         | 3053 | 0.631 (0.473,0.842) | 0.00173 |
| FPVWTV         | About how many hours per week do you spend watching television? 1 if "at least 7 but less than 14 hours/week", 0 otherwise.                                                                                  | 3058 | 0.817 (0.719,0.927) | 0.00177 |
| PRDFEV1R       | Predicted FEV1/FVC (FEV1: forced expiratory volume in one second; FVC: forced vital capacity)                                                                                                                | 3067 | 0.95 (0.92,0.981)   | 0.00182 |
| LPFEFFRT       | During the past week, how often did you feel like everything I did was an effort? 1 if "rarely or none of the time (<1 day)", 0 otherwise.                                                                   | 3036 | 0.82 (0.724,0.929)  | 0.00189 |
| HSPA1B_2763979 | Heat shock 70kDa protein 1B (rs2763979)                                                                                                                                                                      | 2927 | 1.2 (1.07,1.35)     | 0.00193 |
| P4IF           | Teng MMS, Question 12a. No repeat: "No ifs, ands or buts". 1 if "not attempted/disabled" when trying to repeat "no ifs"                                                                                      | 3053 | 22.4 (3.13,161)     | 0.00195 |
| WTOTBMD        | Whole body total bone mineral density (gm/cm <sup>2</sup> )                                                                                                                                                  | 2961 | 1.83 (1.25,2.68)    | 0.00196 |
| FPAC12MO       | In the past 12 months, did you do aerobics, calisthenics, slimmastics, at least 10 times? 1 if yes, 0 otherwise.                                                                                             | 3062 | 0.806 (0.703,0.924) | 0.00198 |
| Y1tricyc       | Indicator variable for tetracyclic antidepressant use. 1 if yes, 0 otherwise.                                                                                                                                | 3058 | 1.55 (1.17,2.05)    | 0.00222 |
| STSEGDEP       | Major ST segment depression. 1 if present, 0 otherwise.                                                                                                                                                      | 3067 | 2.42 (1.37,4.28)    | 0.0023  |
| Y1betabk       | Indicator variable for beta-adrenergic blocker medication use. 1 if yes, 0 otherwise.                                                                                                                        | 3058 | 1.25 (1.08,1.45)    | 0.00231 |
| LEPR1ID        | Leptin receptor I insertion/deletion                                                                                                                                                                         | 2994 | 0.848 (0.762,0.943) | 0.00235 |
| TSP1BMD        | Thor spine bone mineral density (gm/cm <sup>2</sup> )                                                                                                                                                        | 3054 | 1.64 (1.19,2.25)    | 0.00244 |

|                |                                                                                                                                                                                                                                                     |      |                     |         |
|----------------|-----------------------------------------------------------------------------------------------------------------------------------------------------------------------------------------------------------------------------------------------------|------|---------------------|---------|
| BQLOS5LB       | Have you lost 5 or more pounds at any time over the past 12 months? 1 if yes, 0 otherwise.                                                                                                                                                          | 3067 | 1.18 (1.06,1.31)    | 0.00257 |
| HQRSRVCS       | How often do you usually attend religious services, meetings or activities? 1 if "a few times per year", 0 otherwise.                                                                                                                               | 3062 | 1.24 (1.07,1.42)    | 0.00285 |
| LLEGAREA       | Left leg area (cm <sup>2</sup> )                                                                                                                                                                                                                    | 2945 | 1 (1,1)             | 0.00294 |
| HQSSFRNE       | In a typical week, how often do you get together with friends or neighbors? 1 if "less than once per week", 0 otherwise.                                                                                                                            | 3034 | 1.21 (1.07,1.37)    | 0.00296 |
| CHSindex_Frail | Is the participant frail according to the Cardiovascular Health Study (CHS) frailty index? (i.e., two of five frailty components) 1 if yes, 0 otherwise.                                                                                            | 2885 | 1.98 (1.26,3.12)    | 0.00309 |
| SELL_4987342   | Selectin L precursor (rs4987342)                                                                                                                                                                                                                    | 2971 | 0.834 (0.739,0.941) | 0.00313 |
| P4FRHD         | Teng MMS, Question 8c. Point to the object or a part of your own body and ask the participant to name it (foreheard). 1 if participant points correctly, 0 otherwise.                                                                               | 3054 | 0.603 (0.431,0.843) | 0.00315 |
| PQAJBP30       | In the past 12 months, have you had any pain in your back? 1 is yes, 0 otherwise.                                                                                                                                                                   | 3066 | 0.852 (0.766,0.948) | 0.00322 |
| IL1RN_315949   | Interleukin 1 receptor antagonist (rs315949)                                                                                                                                                                                                        | 2935 | 1.18 (1.06,1.31)    | 0.00324 |
| P2BP2          | Does the participant have high blood pressure (systolic > 199 mm Hg, or diastolic > 109 mmHg)? 1 if yes, 0 otherwise.                                                                                                                               | 3066 | 1.66 (1.18,2.33)    | 0.00329 |
| LTHHAMD        | Left thigh hamstrings density (HU)                                                                                                                                                                                                                  | 3008 | 0.991 (0.985,0.997) | 0.00338 |
| Q_INF          | Is the ECG Q/R amplitude ratio $\geq 1/3$ , plus Q duration $\geq 0.03$ sec in lead II? 1 if yes, 0 otherwise.                                                                                                                                      | 3067 | 3.71 (1.54,8.95)    | 0.00345 |
| PELVBMC        | Pelvic bone mineral content (gm)                                                                                                                                                                                                                    | 2989 | 1 (1,1)             | 0.00352 |
| LONGPR         | Is the ECG P-R interval > 220 msec? 1 if yes, 0 otherwise.                                                                                                                                                                                          | 2988 | 1.38 (1.11,1.71)    | 0.0037  |
| FPHI12MO       | In the past 12 months, did you do any high intensity exercise activities such as bicycling, swimming, jogging, racquet sports or using a stair-stepping, rowing or cross country ski machine or exercycle, at least 10 times? 1 if no, 0 otherwise. | 3062 | 1.2 (1.06,1.36)     | 0.00378 |
| TYR1042602     | Tyrosinase, rs1042602                                                                                                                                                                                                                               | 2965 | 1.17 (1.05,1.31)    | 0.00379 |
| FPDIFSTA       | Because of a health or physical problem, do you have any difficulty standing up from a chair without using your arms? 1 if no, 0 otherwise.                                                                                                         | 3065 | 0.8 (0.687,0.931)   | 0.00389 |
| P2KYP          | Does the participant sit sideways due to kyphosis? 1 if yes, 0 otherwise.                                                                                                                                                                           | 2990 | 2.02 (1.25,3.25)    | 0.0041  |
| ABLE5CS        | Is the participant able to complete five chair stands? 1 if yes, 0 otherwise.                                                                                                                                                                       | 3038 | 0.654 (0.489,0.875) | 0.00422 |

|                  |                                                                                                                                                                                                               |      |                     |         |
|------------------|---------------------------------------------------------------------------------------------------------------------------------------------------------------------------------------------------------------|------|---------------------|---------|
| LRIBBMC          | Left rib bone mineral content (gm)                                                                                                                                                                            | 3028 | 1 (1,1.01)          | 0.00442 |
| NBMC             | Femoral neck bone mineral content                                                                                                                                                                             | 3040 | 1.08 (1.02,1.14)    | 0.00443 |
| PR               | ECG PR interval                                                                                                                                                                                               | 2988 | 1 (1,1)             | 0.00448 |
| HQFEDINS         | In addition to Medicare, are you currently covered by any other federal government health insurance programs such as Medicaid, CHAMPUS/VA or other military programs? 1 if yes, 0 otherwise.                  | 3063 | 1.26 (1.07,1.48)    | 0.00459 |
| SIM1             | Single-minded homolog 1 (rs3734355)                                                                                                                                                                           | 2994 | 1.23 (1.07,1.43)    | 0.00466 |
| LBDMKIDN         | Has a Dr. ever told you that you have kidney disease? 1 if yes, 0 otherwise.                                                                                                                                  | 3064 | 1.73 (1.18,2.53)    | 0.00499 |
| P3INYN           | Do you have any problems from recent surgery, injury, or other health conditions that might prevent you from standing up from a chair, standing on one leg, or walking? 1 if yes, 0 otherwise.                | 3051 | 1.37 (1.1,1.71)     | 0.00506 |
| FPPA12MO         | In the past 12 months, did you do gardening or yardwork, like mowing or raking the lawn, or weeding (or shoveling snow), at least 10 times? 1 if no, 0 otherwise.                                             | 3066 | 1.16 (1.05,1.29)    | 0.00509 |
| BQWEATBR         | Thinking about a usual or normal week, how many days out of the seven days a week do you eat breakfast? 1 if "five", 0 otherwise.                                                                             | 3046 | 1.6 (1.15,2.23)     | 0.00514 |
| FPPSKWK          | Kcal/kg/week climbing stairs                                                                                                                                                                                  | 2956 | 0.897 (0.832,0.968) | 0.00521 |
| P1BCT            | Have you ever been told you have a disorder relating to blood clotting or coagulation? 1 if no, 0 otherwise.                                                                                                  | 3033 | 0.733 (0.588,0.913) | 0.0055  |
| MHHCTIA          | Has a Dr. ever told you that you had TIA, transient ischemic attack, or mini-stroke? 1 if no, 0 otherwise.                                                                                                    | 3067 | 0.765 (0.633,0.925) | 0.00558 |
| FPEW12MO         | In the past 12 months, did you go walking for exercise, at least 10 times? 1 if yes, 0 otherwise.                                                                                                             | 3066 | 0.862 (0.776,0.958) | 0.00579 |
| P4STE2           | Teng MMS, Question 18b. Would you please tell me again where you were born? 1 if participant response corresponds to "not attempted / disabled", 0 otherwise.                                                 | 3051 | 7.03 (1.75,28.2)    | 0.00596 |
| TSPIAREA         | Thor spine area (cm <sup>2</sup> -sq)                                                                                                                                                                         | 3054 | 0.997 (0.994,0.999) | 0.00654 |
| P4PHND           | Teng MMS, Question 16c. Take this paper with your left (right for left handed person) hand, fold it in half using both hands, and hand it back to me. 1 if participant correctly completes task, 0 otherwise. | 3016 | 0.658 (0.485,0.891) | 0.0069  |
| ALBUMIN1         | Serum albumin (g/dL)                                                                                                                                                                                          | 3041 | 0.793 (0.669,0.94)  | 0.00756 |
| MMMFLAG          | Are values missing in the Teng 3MS test? 1 if yes, 0 otherwise.                                                                                                                                               | 3058 | 1.32 (1.08,1.61)    | 0.00757 |
| PPARGC1A_8192678 | Peroxisome proliferative activated receptor-gamma coactivator 1 alpha (rs8192678)                                                                                                                             | 2998 | 1.16 (1.04,1.29)    | 0.00786 |
| ACE_ID           | ACE insertion deletion (rs1799752)                                                                                                                                                                            | 2966 | 0.855 (0.762,0.961) | 0.00827 |

|           |                                                                                                                                                                                                                         |      |                     |         |
|-----------|-------------------------------------------------------------------------------------------------------------------------------------------------------------------------------------------------------------------------|------|---------------------|---------|
| HQSSRELY  | Does anybody rely on you to do something for them each day, like shopping, cooking, cleaning, repairs, child care, etc? 1 if yes, 0 otherwise.                                                                          | 3061 | 0.857 (0.763,0.962) | 0.00895 |
| LSPIAREA  | Lumb spine area (cm2-sq)                                                                                                                                                                                                | 3046 | 1.01 (1,1.01)       | 0.00896 |
| HEADAREA  | Head area (cm2-sq)                                                                                                                                                                                                      | 3047 | 1 (1,1.01)          | 0.00898 |
| FPPSHOT   | Did you get a flue shot in the past 12 months? 1 if yes, 0 otherwise.                                                                                                                                                   | 3062 | 0.863 (0.772,0.964) | 0.00899 |
| AKT1G171T | AKT1 (rs1130214)                                                                                                                                                                                                        | 2993 | 1.25 (1.06,1.48)    | 0.00925 |
| RTHHAMD   | Right thigh hamstrings density (HU)                                                                                                                                                                                     | 3008 | 0.992 (0.986,0.998) | 0.00937 |
| P4TAP2    | Finger tapping test. Number of taps in 15 seconds (trial 2)                                                                                                                                                             | 3022 | 0.994 (0.99,0.999)  | 0.00954 |
| P4NUM     | Teng MMS, Question 2. I am going to say three words for you to remember. Repeat them after I have said all three words: shirt, blue, honesty. Number of presentations necessary for participant to repeat the sequence. | 3024 | 1.26 (1.06,1.5)     | 0.00954 |
| P4SIDE    | Indicator variable for not performing the finger tapping test due to exclusions                                                                                                                                         | 3037 | 2.12 (1.2,3.75)     | 0.00962 |
| FPPWKKWK  | Kcal/kg/week doing paid work                                                                                                                                                                                            | 3055 | 0.997 (0.995,0.999) | 0.00965 |
| LSPIBMD   | Lumb spine BMD (gm/cm2)                                                                                                                                                                                                 | 3046 | 1.36 (1.07,1.71)    | 0.0103  |
| PRFEV1R6  | Predicted FEV1/FEV6 (FEV1: forced expiratory volume in 1 second; FEV6: forced expiratory volume in 6 seconds)                                                                                                           | 3067 | 0.941 (0.898,0.986) | 0.0106  |
| LBOMLOTH  | Has a doctor ever told you that you had low thyroid or hypothyroidism? 1 if yes, 0 otherwise.                                                                                                                           | 3066 | 0.751 (0.603,0.936) | 0.0106  |
| HDL1      | Plasma high density lipoprotein (mg/dL)                                                                                                                                                                                 | 3032 | 0.996 (0.993,0.999) | 0.0108  |
| BQSHEAT   | How often do you eat a snack or drink before bedtime to help you sleep? 1 if "sometimes", 0 otherwise.                                                                                                                  | 3055 | 0.733 (0.576,0.931) | 0.0109  |
| HACAT     | Walking and exercise kcal category. 1 if category "0", 0 otherwise                                                                                                                                                      | 3067 | 1.22 (1.05,1.42)    | 0.011   |
| P4SEAS    | Teng MMS, Question 6c. What season of the year is it? 1 if "not attempted/disabled", 0 otherwise.                                                                                                                       | 3055 | 12.8 (1.79,91.3)    | 0.011   |
| NAREA     | Femoral neck Area (cm-sq)                                                                                                                                                                                               | 3040 | 1.1 (1.02,1.19)     | 0.0111  |
| LESSO10P  | Lift/carry 10 lbs less often? 1 if "yes", 0 otherwise                                                                                                                                                                   | 3030 | 1.26 (1.05,1.5)     | 0.0112  |
| OMESWORY  | How often do you worry about your eyesight? 1 if "most of the time", 0 otherwise.                                                                                                                                       | 3067 | 1.46 (1.09,1.95)    | 0.0114  |
| EASE10P   | Ease lift/carry 10 pounds (0 = unable to do; 6 = very easy)                                                                                                                                                             | 3063 | 0.943 (0.901,0.987) | 0.0117  |
| P4SHLD    | Teng MMS, question 8e. What is this part of the body? (point to shoulder) 1 if correct, 0 otherwise.                                                                                                                    | 3053 | 0.655 (0.472,0.91)  | 0.0117  |
| FAST8HDL1 | Fasting plasma HDL (mg/dL)                                                                                                                                                                                              | 2960 | 0.996 (0.993,0.999) | 0.012   |
| P4PENC    | Teng MMS, Question 8a. What is this? (point to a pencil) 1 if                                                                                                                                                           | 3055 | 0.386 (0.183,0.812) | 0.0121  |

|                       |                                                                                                                                                                                                 |      |                     |        |
|-----------------------|-------------------------------------------------------------------------------------------------------------------------------------------------------------------------------------------------|------|---------------------|--------|
|                       | correct, 0 otherwise.                                                                                                                                                                           |      |                     |        |
| WALKCAT               | Minutes walking/week category. 1 if "0 min/wk", 0 otherwise                                                                                                                                     | 3054 | 1.15 (1.03,1.27)    | 0.0123 |
| LPIIOTI               | Please tell me if you (and your husband/wife/partner) own any other investments (besides checking or savings account, money market account, CDs, etc.)? 1 if "no", 0 otherwise                  | 3007 | 1.2 (1.04,1.37)     | 0.0125 |
| BQSHFESD              | How often do you feel excessively (overly) sleepy during the day? 1 if "almost always", 0 otherwise.                                                                                            | 3064 | 1.64 (1.11,2.42)    | 0.0127 |
| BQSHHRS               | How many hours of sleep do you usually get at night?                                                                                                                                            | 3010 | 1.05 (1.01,1.09)    | 0.0127 |
| OMESGLAU              | Has a Dr. ever told you that you have glaucoma? 1 if yes, 0 otherwise.                                                                                                                          | 3066 | 1.23 (1.04,1.44)    | 0.0139 |
| HIGHX90               | 90 min or more high intensity exercise per week. 1 if yes, 0 if no.                                                                                                                             | 3050 | 0.82 (0.7,0.961)    | 0.014  |
| PREDFVC               | Predicted forced vital capacity (ml)                                                                                                                                                            | 3067 | 1 (1,1)             | 0.0141 |
| CYP19A1_1008805       | Aromatase cytochrome P450 subfamily 19 (Cyp19) (rs749292)                                                                                                                                       | 2944 | 1.14 (1.03,1.27)    | 0.0151 |
| P2MO                  | Do you have any metal objects in your body, such as a pacemaker, staples, screws, plates, etc? 1 if yes, 0 otherwise.                                                                           | 3065 | 1.2 (1.04,1.4)      | 0.0155 |
| DEFICITindex_PreFrail | Does the participant exhibit prefrailty according to the 45-variable health deficit index? 1 if yes, 0 otherwise.                                                                               | 2990 | 1.14 (1.02,1.27)    | 0.0156 |
| FPHCKKWK              | Kcal/kg/week doing heavy chores                                                                                                                                                                 | 3066 | 0.995 (0.991,0.999) | 0.0158 |
| LLATABSD              | Left Lat abdominal density standard deviation (HU)                                                                                                                                              | 2951 | 0.972 (0.95,0.995)  | 0.0159 |
| LONGQT                | Long QT duration                                                                                                                                                                                | 3065 | 1.23 (1.04,1.46)    | 0.016  |
| FPDIFHW               | Do you have any difficulty doing heavy work around the house like vacuuming, shoveling snow, mowing or raking the lawn, gardening, or scrubbing windows, walls or floors? 1 if no, 0 otherwise. | 3065 | 0.851 (0.745,0.971) | 0.0166 |
| BQHT25FT              | How tall were you without shoes at about age 25? If you don't remember exactly, please make your best guess.                                                                                    | 3019 | 1.21 (1.03,1.42)    | 0.017  |
| P3THPA                | Thigh circumference midpoint                                                                                                                                                                    | 3063 | 1.04 (1.01,1.07)    | 0.0176 |
| RLEGAREA              | Right leg area (cm <sup>2</sup> )                                                                                                                                                               | 2924 | 1 (1,1)             | 0.0176 |
| OMESCAT2              | Has a doctor ever told you that you have cataracts in both eyes, at the same time? 1 if yes, 0 otherwise.                                                                                       | 3062 | 1.15 (1.02,1.29)    | 0.0179 |
| AVDEFTYP              | Type of atrioventricular conduction defect. 1 if "long P-R interval", 0 otherwise.                                                                                                              | 3067 | 1.27 (1.04,1.56)    | 0.0183 |
| LPFFAIL               | During the past week, how often have you felt that your life has been a failure? 1 if "most or all of the time", 0 otherwise.                                                                   | 3045 | 1.66 (1.09,2.53)    | 0.0183 |
| PAI2846               | PAI1 2846 A/G (rs6092)                                                                                                                                                                          | 2962 | 0.824 (0.701,0.968) | 0.0187 |
| BQEATJOY              | Is meal time enjoyable? 1 if "neither enjoyable nor unenjoyable", 0                                                                                                                             | 3053 | 1.36 (1.05,1.77)    | 0.0193 |

|               |                                                                                                                                                                                                                                                                    |      |                     |        |
|---------------|--------------------------------------------------------------------------------------------------------------------------------------------------------------------------------------------------------------------------------------------------------------------|------|---------------------|--------|
|               | otherwise.                                                                                                                                                                                                                                                         |      |                     |        |
| P3THDI        | Thigh: distance betwn inguinal/patella                                                                                                                                                                                                                             | 3063 | 1.02 (1,1.03)       | 0.0205 |
| HSPB2_4252591 | Heat shock 27kDa protein 2 (rs4252591)                                                                                                                                                                                                                             | 2961 | 1.14 (1.02,1.27)    | 0.0207 |
| TRNKBMC       | Trunk bone mineral content (gm)                                                                                                                                                                                                                                    | 2945 | 1 (1,1)             | 0.0209 |
| MHLCCHBR      | Has a doctor ever told you that you had chronic bronchitis? 1 if yes, 0 otherwise.                                                                                                                                                                                 | 3067 | 1.21 (1.03,1.42)    | 0.0209 |
| PQAJBO12      | During the past 12 months, have you fainted, blacked out, or lost consciousness? 1 if no, 0 otherwise.                                                                                                                                                             | 3065 | 0.716 (0.538,0.952) | 0.0214 |
| Y1candrg      | Indicator variable for anti-cancer medications. 1 if yes, 0 otherwise.                                                                                                                                                                                             | 3058 | 1.64 (1.08,2.5)     | 0.0215 |
| BQEATSIN      | Do you usually eat meals alone? 1 if "all the time", 0 otherwise.                                                                                                                                                                                                  | 3057 | 1.2 (1.03,1.41)     | 0.022  |
| PREDFEV6      | Predicted forced expiratory volume in six seconds (ml)                                                                                                                                                                                                             | 3067 | 1 (1,1)             | 0.0221 |
| THIMF         | Total (R+L) thigh intermuscular fat area (cm-sq)                                                                                                                                                                                                                   | 3008 | 1 (1,1.01)          | 0.0222 |
| BQSHSNOR      | Have you ever snored (now or at any time in the past)? 1 if yes, 0 otherwise.                                                                                                                                                                                      | 3065 | 0.879 (0.787,0.982) | 0.0226 |
| FPAKCKWK      | Kcal/kg/week doing aerobic dance                                                                                                                                                                                                                                   | 3062 | 0.986 (0.974,0.998) | 0.0227 |
| HQINMED       | In addition to Medicare, do you have any health insurance plan that pays for prescription medications? 1 if yes, 0 otherwise.                                                                                                                                      | 3062 | 0.882 (0.791,0.983) | 0.0229 |
| LLNPEF        | Lower limit of normal for peak expiratory flow (ml/sec)                                                                                                                                                                                                            | 3067 | 1 (1,1)             | 0.023  |
| LPFISUBF      | Are you receiving any free or subsidized food, such as food stamps or Meals on Wheels? 1 if yes, 0 otherwise.                                                                                                                                                      | 3038 | 1.27 (1.03,1.58)    | 0.0245 |
| IL62298       | IL-6 2290 (rs2069832)                                                                                                                                                                                                                                              | 2955 | 1.13 (1.02,1.26)    | 0.0248 |
| LPFUNFR       | During the past week, how often did you feel as if people were unfriendly? 1 if "most or all of the time", 0 otherwise.                                                                                                                                            | 3039 | 1.87 (1.08,3.23)    | 0.0248 |
| RTHIMF        | Right thigh intermuscular fat area (cm-sq)                                                                                                                                                                                                                         | 3008 | 1.01 (1,1.02)       | 0.0249 |
| PPARG_4135256 | Peroxisome proliferative activated receptor gamma (rs4135256)                                                                                                                                                                                                      | 2944 | 1.38 (1.04,1.82)    | 0.0251 |
| SAA2_2468844  | Serum amyloid A2 (rs2468844)                                                                                                                                                                                                                                       | 2949 | 1.29 (1.03,1.61)    | 0.0257 |
| P4PFLD        | Teng MMS, Question 16b. Take this paper with your left (right for left handed person) hand, fold it in half using both hands, and hand it back to me. 1 if participant correctly folds paper in half, 0 otherwise.                                                 | 3024 | 0.733 (0.557,0.964) | 0.0263 |
| LTHIMF        | Left thigh intermuscular fat area (cm-sq)                                                                                                                                                                                                                          | 3008 | 1.01 (1,1.02)       | 0.0266 |
| OMESSWUC      | How much difficulty do you have doing work or hobbies that require you to see well up close, such as cooking, sewing, fixing things around the house, or using hand tools? 1 if "stopped doing it for other reasons or not interested in doing this", 0 otherwise. | 3066 | 3.58 (1.15,11.1)    | 0.0273 |
| OMESACT       | The next question is about daily activities that may be affected by                                                                                                                                                                                                | 3064 | 0.824 (0.693,0.979) | 0.0274 |

|              |                                                                                                                                                                                                               |      |                     |        |
|--------------|---------------------------------------------------------------------------------------------------------------------------------------------------------------------------------------------------------------|------|---------------------|--------|
|              | your vision, such as your job, housework, child care, school, or community activities. Are you limited in the kinds or amount of work or other activities you can do? 1 if "none of the time", 0 otherwise.   |      |                     |        |
| MHLCPNEU     | Has a doctor ever told you that you had pneumonia? 1 if no, 0 otherwise.                                                                                                                                      | 3067 | 0.882 (0.788,0.986) | 0.0274 |
| MHCHMGMT     | Has a doctor ever told you that you had cancer, a malignant growth, or malignant tumor? 1 if no, 0 otherwise.                                                                                                 | 3067 | 0.867 (0.763,0.985) | 0.0278 |
| BQWEATEV     | Thinking about a usual or normal week, how many days out of the seven days a week do you eat an evening snack? 1 if "zero", 0 otherwise.                                                                      | 2983 | 1.13 (1.01,1.26)    | 0.0289 |
| RTHQUSD      | Right thigh quadriceps density standard deviation (HU)                                                                                                                                                        | 3008 | 1.01 (1,1.02)       | 0.0294 |
| HIGHXMIN     | Sum of minutes per week of aerobic exercise, weight training, and any high intensity activity                                                                                                                 | 3050 | 0.999 (0.999,1)     | 0.0301 |
| FPDIFARM     | Do you have any difficulty raising your arms up over your head? 1 if yes, 0 otherwise.                                                                                                                        | 3067 | 1.23 (1.02,1.47)    | 0.0307 |
| HSPB2_762550 | Heat shock 27 kDa protein 2 (rs762550)                                                                                                                                                                        | 2958 | 0.812 (0.672,0.981) | 0.0307 |
| PAI10461     | PAI1 10461 A/G (rs2227693)                                                                                                                                                                                    | 2984 | 0.832 (0.703,0.983) | 0.0311 |
| PREDMIP      | Predicted maximum inspiratory pressure (cm H2O)                                                                                                                                                               | 3067 | 1 (1,1.01)          | 0.0325 |
| QCMETPRB     | QC abdomen metal problem for computed tomography (soft tissue). 1 if no metal artifact in image, 0 otherwise.                                                                                                 | 3023 | 0.468 (0.234,0.939) | 0.0325 |
| P1BV3        | Phlebotomy: Was the SCAT-1 (5 ml) tube filled to capacity? 1 if yes, 0 otherwise.                                                                                                                             | 3012 | 0.51 (0.274,0.951)  | 0.034  |
| LBOMGOUT     | Has a doctor ever told you that you had gout? 1 if yes, 0 otherwise.                                                                                                                                          | 3067 | 1.22 (1.01,1.46)    | 0.0344 |
| P4SPIR       | Was the spirometry test completed? 1 if yes, 0 otherwise.                                                                                                                                                     | 3024 | 0.819 (0.68,0.986)  | 0.0347 |
| PAI1_1       | Citrated plasma plasminogen activator inhibitor 1 (ng/mL)                                                                                                                                                     | 3004 | 1 (1,1)             | 0.0352 |
| P4PCOR       | Take this paper with your left (right for left handed person) hand, fold it in half using both hands, and hand it back to me. 1 if participant does not take paper in correct hand, 0 if performed correctly. | 3048 | 1.2 (1.01,1.43)     | 0.0354 |
| BMICAT       | Body mass index category (1 if BMI > 25; 2 if 25 <= BMI < 30; 3 if BMI >= 30)                                                                                                                                 | 3067 | 0.928 (0.866,0.995) | 0.0356 |
| RPSOD        | Right psoas density (HU)                                                                                                                                                                                      | 2954 | 0.992 (0.985,1)     | 0.0357 |
| P2SIDF       | Sitting height. Difference between measurements 1 and 2 (mm)                                                                                                                                                  | 3056 | 1.02 (1,1.04)       | 0.0357 |
| FPBED12      | During the past 12 months, did you stay in bed all or most of the day because of an illness or injury? Please include days that you                                                                           | 3066 | 1.15 (1.01,1.31)    | 0.0359 |

|          |                                                                                                                                                                                                   |      |                     |        |
|----------|---------------------------------------------------------------------------------------------------------------------------------------------------------------------------------------------------|------|---------------------|--------|
|          | were a patient in the hospital. 1 if yes, 0 otherwise.                                                                                                                                            |      |                     |        |
| P4SHRT   | I am going to say three words for you to remember. Repeat them after I have said all three words: shirt, blue, honesty. 1 if participant does not correctly repeat the word "shirt", 0 otherwise. | 3057 | 1.1 (1.01,1.21)     | 0.0374 |
| NBMD     | Femoral neck bone mineral density                                                                                                                                                                 | 3040 | 1.48 (1.02,2.15)    | 0.0377 |
| LTHHAM   | Left thigh hamstrings area (cm-sq)                                                                                                                                                                | 3008 | 1.01 (1,1.02)       | 0.0378 |
| BQSHDGES | How often do you not get enough sleep? 1 if "often", 0 otherwise.                                                                                                                                 | 3050 | 0.746 (0.565,0.984) | 0.0379 |
| IL6G174C | Interleukin-6 IL6 G174C (rs1800795)                                                                                                                                                               | 2981 | 1.12 (1.01,1.25)    | 0.0388 |
| PREDFEV1 | Predicted forced expiratory volume in one second                                                                                                                                                  | 3067 | 1 (1,1)             | 0.0393 |
| ABKVP    | Abdomen computed tomography peak kilovolts (energy at which the abdominal CT image is acquired) (kVp)                                                                                             | 3022 | 1.01 (1,1.03)       | 0.04   |
| LBSGULCR | Has a doctor ever told you that you had a stomach, or duodenal ulcer? 1 if no, 0 otherwise.                                                                                                       | 3067 | 0.87 (0.762,0.994)  | 0.0402 |
| LTHQUSD  | Left thigh quadriceps density standard deviation (HU)                                                                                                                                             | 3008 | 1.01 (1,1.02)       | 0.0402 |
| LPSO     | Area - Left psoas (cm-sq)                                                                                                                                                                         | 2954 | 1.02 (1,1.03)       | 0.0403 |
| P4AND    | Teng MMS, Question 12. Now repeat: "No ifs, ands or buts". 1 if participant does not correctly repeat "ands", 0 otherwise.                                                                        | 3051 | 1.21 (1.01,1.46)    | 0.0405 |
| FPGS12MO | In the past 12 months, did you go or help with grocery shopping at least 10 times? (includes help buying, carrying or unpacking groceries). 1 if yes, 0 otherwise.                                | 3065 | 0.825 (0.686,0.992) | 0.0411 |
| AXIS     | ECG QRS axis                                                                                                                                                                                      | 3063 | 0.998 (0.997,1)     | 0.0424 |
| Y1thyr   | Indicator variable for thyroid agonist medications. 1 is yes, 0 otherwise.                                                                                                                        | 3058 | 0.819 (0.675,0.993) | 0.0424 |
| HQSSFCX  | For the one friend that you see or hear from most, how often do you see or hear from that person? 1 if "about once a month", 0 otherwise.                                                         | 2970 | 1.25 (1.01,1.55)    | 0.0427 |
| CURDRNK1 | Current drinking consumption at baseline (1 = No consumption in past year; 2 = Less than once per week; 3 = 1-7 times per; 4 = More than 1 per day)                                               | 3055 | 0.946 (0.896,0.998) | 0.0433 |
| P4BUT    | Teng MMS, Question 12. Now repeat: "No ifs, ands or buts". 1 if participant does not correctly repeat "buts", 0 otherwise.                                                                        | 3049 | 1.2 (1,1.43)        | 0.045  |
| THFOV    | Thigh Field of View (mm)                                                                                                                                                                          | 3020 | 0.999 (0.997,1)     | 0.0453 |
| CES_D10  | CES-D short form score calculated according to Andresen and Malmgren 1994 (Screening for depression in well older adults: evaluation of a short form of the CES-D)                                | 3043 | 1.01 (1,1.03)       | 0.0464 |
| DID6MUW  | Was the 6m usual walk completed? 1 is yes, 0 if no                                                                                                                                                | 3050 | 0.316 (0.102,0.982) | 0.0465 |



|               |                                                                                                                                                                                                                                            |      |                     |        |
|---------------|--------------------------------------------------------------------------------------------------------------------------------------------------------------------------------------------------------------------------------------------|------|---------------------|--------|
| P3RCS         | Chair stands: When I say 'Go' stand five times in a row, as quickly as you can, without stopping. Stand up all the way, and sit all the way down each time. 1 if the participant attempted to complete stands but was unable, 0 otherwise. | 2996 | 1.88 (1.01,3.5)     | 0.0473 |
| Y1ostdrg      | Indicator variable for osteoporosis medications. 1 if yes, 0 if no.                                                                                                                                                                        | 3058 | 0.74 (0.55,0.996)   | 0.0473 |
| Y1antplt      | Indicator variable for any antiplatelet medication. 1 if yes, 0 if no.                                                                                                                                                                     | 3058 | 1.11 (1,1.24)       | 0.0473 |
| PROZ_17879696 | Protein Z; vitamin K-dependent plasma (rs17879696)                                                                                                                                                                                         | 2974 | 0.857 (0.736,0.998) | 0.0474 |
| BMI           | Body mass index (kg/m-sq)                                                                                                                                                                                                                  | 3067 | 0.989 (0.978,1)     | 0.0478 |
| P4ABEX        | CT Tracking: abdominal scan exam number (1 - 899)                                                                                                                                                                                          | 2935 | 1 (1,1)             | 0.0484 |
| P4KNK         | Teng MMS, Question 8g. What is this? (point to the object or a part of your own body and ask the participant to name it). 1 if "not attempted /disabled", 0 otherwise.                                                                     | 3047 | 2.24 (1,5.01)       | 0.0486 |
| LBOMPARK      | Has a doctor ever told you that you had Parkinson's disease? 1 if yes, 0 otherwise.                                                                                                                                                        | 3066 | 1.7 (1,2.87)        | 0.0494 |
| BQGROC        | Do you get the groceries that you need? 1 if "all of the time", 0 otherwise.                                                                                                                                                               | 3065 | 0.878 (0.772,1)     | 0.0495 |
| Y1nsaid       | Indicator variable for non-steroidal anti-inflammatory medications. 1 if yes, 0 otherwise.                                                                                                                                                 | 3058 | 0.879 (0.773,1)     | 0.0496 |

**Supplemental Table 4. Top-ranking variables that best predicted mortality over 13 years in the full Health ABC cohort (age- and sex-adjusted models).** The table lists 10 variables that best predicted mortality as identified from the data mining and cross-validation procedure described in Supplemental Figure 2. The procedure was identical to that used to generate the variable ranking shown in Table 1, except the screen was performed using three-variable Cox regression models (i.e., variable  $X$  + age + sex). Variables listed below were thus able to improve mortality prediction by the largest margin when added to an initial bivariate model with age and sex as predictors. All mean AUC values were calculated using 30,000 cross-validation trials, with standard error less than 0.001 in each case. The standard deviation among AUC statistics generated in the 30,000 simulation trials is listed for each variable in the final column.

| Variable                                                                       | Transformation | Mean AUC | SD (AUC) |
|--------------------------------------------------------------------------------|----------------|----------|----------|
| DSST score (No. correct substitutions)*                                        | $\lambda = 2$  | 0.619    | 0.023    |
| Health ABC performance score (0 - 4) <sup>†</sup>                              | $\lambda = 2$  | 0.619    | 0.022    |
| Serum cystatin C (mg/L) <sup>‡</sup>                                           | $\lambda = 0$  | 0.613    | 0.022    |
| Time to walk 6 m (fastest of two trials) <sup>†</sup>                          | $\lambda = -1$ | 0.612    | 0.023    |
| Walking ability index based on self-report (0 = unable; 9 = easy) <sup>†</sup> | $\lambda = 2$  | 0.608    | 0.022    |
| EPESE performance battery score 0 – 12 <sup>†</sup>                            | $\lambda = 2$  | 0.607    | 0.022    |
| 3MS Score*                                                                     | $\lambda = 2$  | 0.607    | 0.021    |
| Full standing balance test time 0 – 90 secs <sup>†</sup>                       | $\lambda = 2$  | 0.607    | 0.023    |
| Serum c-reactive protein ( $\mu\text{g/mL}$ ) <sup>‡</sup>                     | $\lambda = 0$  | 0.604    | 0.023    |
| Stair climbing ability index (0 = unable; 9 =                                  | $\lambda = 2$  | 0.604    | 0.023    |

|                    |  |  |  |
|--------------------|--|--|--|
| easy) <sup>†</sup> |  |  |  |
|--------------------|--|--|--|

\*DSST score (no. correct substitutions) was correlated with 3MS score ( $r_s = 0.59$ ;  $P < 0.001$ ).

<sup>†</sup>Health ABC performance score was correlated with full standing balance test time ( $r_s = 0.76$ ), time taken to walk 6 m ( $r_s = -0.70$ ), EPESE performance battery score ( $r_s = 0.69$ ), walking ability index ( $r_s = 0.37$ ), and stair climbing ability index ( $r_s = 0.34$ ) ( $P < 0.001$  for each variable).

<sup>‡</sup>Serum cystatin C was correlated with serum c-reactive protein ( $r_s = 0.14$ ,  $P < 0.001$ ).
